# Supplementary material for: Looking through the Lens of the Ribosome Biogenesis Evolutionary History: Possible Implications for Archaeal Phylogeny and Eukaryogenesis
Source: PubMed Central journal article supplement (PMC8997704; doi:10.1093/molbev/msac054), 2022-03-11
Supplement: msac054_supplementary_data.pdf [file msac054_supplementary_data.pdf]

1 **Supplementary Information**

2

3

4 **Looking through the lens of the ribosome biogenesis evolutionary history:**  
5 **possible implications for archaeal phylogeny and eukaryogenesis**

6

7

8 **Michael Jüttner<sup>1</sup> and Sébastien Ferreira-Cerca<sup>1\*</sup>**

9 <sup>1</sup> Regensburg Center for Biochemistry, Biochemistry III – Institute for Biochemistry, Genetics and  
10 Microbiology, University of Regensburg, Universitätsstraße 31, 93053 Regensburg, Germany

11 \* To whom correspondence should be addressed. Tel: +49 941 943 2539; Fax: +49 941 943 2474;

12 Email: [sebastien.ferreira-cerca@ur.de](mailto:sebastien.ferreira-cerca@ur.de) OrCID: <https://orcid.org/0000-0002-0522-843X>

13

14 **This file contains:**

15 - Supplementary Text 1 and 2

16

17 - Supplementary Figures 1-4

18

19 - Supplementary Note

20

21 - Supplementary Data Source: Selected example of rDNA genes organisation in archaea

## 22 Supplementary Text

### 23 Supplementary Text 1 | On the multiple origins of halophily in archaea

24 In the recent years, metagenomics-based genome assembly has revealed a plethora of hitherto  
25 unknown microorganisms that await their taxonomic classification (Spang et al. 2017; Castelle and  
26 Banfield 2018; Tahon et al. 2021 Sep 8). Among these findings, the discovery of nanosized archaea  
27 which have been grouped within the DPANN (Diapherotrites, Parvarchaeota, Aenigmarchaeota,  
28 Nanoarchaeota and Nanohaloarchaeota) superphylum is of particular interest (Williams et al. 2017;  
29 Dombrowski et al. 2019) (**Figure 1**). These organisms possess restricted metabolic potential and are  
30 believed to possess fast-evolving capacities, the latter feature making phylogenetic analysis rather  
31 difficult (Castelle et al. 2018; Dombrowski et al. 2019). Among these organisms, the Nanohaloarchaea  
32 are of major interest since their phylogenetic positioning is still unclear (**Figure 1**) (Narasingarao et al.  
33 2012; Petitjean et al. 2014; Aouad et al. 2018; Hamm et al. 2019; Feng et al. 2021). On the one hand,  
34 Nanohaloarchaea have been clustered in the rather heterogenous DPANN group as a separate entity  
35 distinct from the “classical” haloarchaea (paraphyletic). On the other hand, some analyses position the  
36 Nanohaloarchaea and Haloarchaea (Halobacteria) with shared ancestry (monophyletic) (Narasingarao  
37 et al. 2012; Petitjean et al. 2014; Aouad et al. 2018) (**Figure 1**). The relative positioning of these two  
38 groups of organisms is critical from an evolutionary point of view, since in the first scenario halophily  
39 would have emerged (at least) twice independently (convergent evolution) and in the second one,  
40 halophily would be the product of a unique evolutionary event (Narasingarao et al. 2012; Petitjean et  
41 al. 2014; Aouad et al. 2018; Dombrowski et al. 2019). More recently, additional groups of halophilic  
42 organisms, the Methanonatronarchaeia and Hikarchaeia, have been described. Similarly, the current  
43 position of Methanonatronarchaeia also remains under active discussion (Sorokin et al. 2017; Aouad  
44 et al. 2018; Aouad et al. 2019; Sorokin et al. 2019; Martijn et al. 2020; Feng et al. 2021) (see **Figure 1**).

45 Interestingly, we have noticed common but also divergent traits related to ribosome biogenesis and  
46 function between Haloarchaea, Nanohaloarchaea, Methanonatronarchaeia and Hikarchaeia. Among  
47 these characteristics, helix 45 (h45), located at the 3' end of the 16S rRNA, contributes to the formation  
48 of the P-site of the SSU. Therefore, change in its structure/sequence is likely to alter ribosomal subunit  
49 function, and general cellular fitness (Formenoy et al. 1994; Knüppel et al. 2021). In addition, h45 is  
50 posttranscriptionally modified (Poldermans et al. 1979; van Gemen et al. 1987; Lafontaine et al. 1994:  
51 1). These rRNA modifications contribute to the stabilisation of the SSU P-site (Van Charldorp et al.  
52 1981; Demirci et al. 2010; Fischer et al. 2015). Recently we have reported that the dimethylation-  
53 dependent reaction of the almost universally conserved ksgA/Dim1 dimethyltransferase, on two  
54 universally conserved adenosines (A<sub>1518</sub> and A<sub>1519</sub>, or A<sub>1451</sub> and A<sub>1452</sub>, *E. coli* and *H. volcanii* numbering,

55 respectively) located in h45 is influenced by the overall sequence/architecture of h45 (Knüppel et al.  
56 2021). Moreover, we could provide evidence that ksgA/Dim1 is required for archaeal cellular fitness,  
57 in good agreement with its particular relevance for ribosome biogenesis; ksgA/Dim1 is the only  
58 widespread conserved ribosome biogenesis factor (Ebersberger et al. 2014; Birikmen et al. 2021;  
59 Knüppel et al. 2021). Based on structural feature variation, we have classified h45 in archaea into 3  
60 main types (**Supplementary Figure 1A**) (Knüppel et al. 2021). Type I represents the canonical and  
61 widespread structure. Type II differs from the canonical structure by the presence of a less stable G•U  
62 base pairing at the end of the h45 stem, thereby widening the modified GNRA tetraloop (see  
63 **Supplementary Figure 1A**) (Knüppel et al. 2021). In the case of type III, specific to Thermococcales, the  
64 internal G-U base pairing present in the h45 stem is replaced by a more stabilising G-C base pairing  
65 (**Supplementary Figure 1A and below**) (Formenoy et al. 1994; Knüppel et al. 2018). Interestingly, we  
66 could also observe that most organisms belonging to the Methanotecta superclass (Halobacteria,  
67 Archaeoglobi, Methanogens class II), and having a common ancestor, share similar h45  
68 structure/sequence (classified as type II) and rRNA modification patterns, that differ from the  
69 prevalent modification pattern observed in h45-type I organisms (Knüppel et al. 2021) (**Supplementary**  
70 **Figure 1A-B**). Interestingly, the Nanohaloarchaea, and DPANN members, apart from the Altiaarchaeota,  
71 do not show the h45 structure and/or sequence similarities with the group mentioned above (Knüppel  
72 et al. 2021). Similarly, the Methanonatronarchaeia do not contain the genuine type II-h45 architecture  
73 found in the Methanotecta group, but the type I architecture prevalent in most of the other  
74 Euryarchaeota and Crenarchaeota members, in agreement with their placement diverging before the  
75 Archaeoglobales (Sorokin et al. 2017; Aouad et al. 2018; Aouad et al. 2019; Sorokin et al. 2019) (see  
76 **Supplementary Figure 1A-B**). In contrast, the Hikarchaeota, are showing the classical Methanotecta  
77 h45 type II architecture, in agreement with their proposed phylogenetic placement (see **Figure 1**)  
78 (Martijn et al. 2020).

79 Our previous study also provides evidence that h45 sequence/structural variation, specifically  
80 observed in the Thermococcales group (h45 type III) (**Supplementary Figure 1B**), is a poor substrate  
81 for the ksgA/Dim1 modification reactions in heterologous context, in comparison to the native  
82 Thermococcales cellular context, thereby suggesting the presence of additional adaptation to  
83 compensate this single nucleotide sequence variation (Knüppel et al. 2021). Finally, previous mutation  
84 analyses of h45 also suggested the requirement of additional sequence/structural integrity of h45 stem  
85 for completion of the ksgA/Dim1-dependent modifications and optimal ribosomal function (Formenoy  
86 et al. 1994; Knüppel et al. 2021). This highlights the functional consequences and essential adaptations  
87 that might be necessary to tolerate sequence/structure changes within h45 observed during the  
88 course of evolution (see **Supplementary Figure 2**).

89 The structural/sequence diversity of h45 within the DPANN group is summarised in **Supplementary**  
90 **Figure 3**. Considering that h45 contributes to the formation of the P-site of the SSU and changes in its  
91 structure/sequences may significantly alter ribosomal subunit function, and general cellular fitness  
92 (Formenoy et al. 1994; Knüppel et al. 2021), the h45 evolution trajectories is likely not infinite and its  
93 potential diversity limited by its functional integrity and/or the capacity to evolve compensatory  
94 mechanisms. Intuitively the expectation of such functional constraints would likely result in limited  
95 diversity within closely related groups of organisms, as observed throughout the Methanotecta  
96 superclass. In other words, strong functional selection will more likely favour stepwise functionally  
97 neutral trajectories over deleterious ones (Nei 2005). Therefore, understanding the biological  
98 consequences of the possible evolutionary trajectories of key ribosomal subunit functional elements,  
99 like h45, may be an important resource to provide additional experimental evidence to the  
100 directionality of complex evolutionary history and support phylogenetic positioning.

101 In addition to h45, other rRNA elements are of interest to support putative evolutionary trajectories.  
102 For example, h31, another 16S rRNA elements contributing to the formation of the SSU P-site is worth  
103 investigating. Similar to h45, h31 is posttranscriptionally modified. Interestingly, the same relative  
104 residue (*E. coli* G<sub>966</sub>, *H. volcanii* U<sub>910</sub> and *S. cerevisiae* U<sub>1191</sub>) is universally modified, however, the  
105 chemical nature of this rRNA modification differs between bacteria, and archaea/eukaryotes (Grosjean  
106 et al. 2008; Piekna-Przybylska et al. 2008; Ferreira-Cerca 2017). In *E. coli*, G<sub>966</sub> is base-methylated by  
107 RsmD (Lesnyak et al. 2007). In contrast, in archaea and eukaryotes, specific addition of 3-amino-3-  
108 carboxypropyl (U-acp3) modification (U<sub>910</sub> or G<sub>966</sub>, *H. volcanii* and *E. coli* numbering, respectively) is  
109 performed by the archaeal and eukaryotic specific aminocarboxypropyltransferase Tsr3 (Twenty S  
110 rRNA accumulation 3) (Grosjean et al. 2008; Li et al. 2009; Meyer et al. 2016). During ribosome  
111 biogenesis, helix 31 is an important interaction hub that is sequentially associated with various  
112 ribosome biogenesis factors in eukaryotes, most of which have functional homologues in archaea  
113 (Wurm et al. 2010; Meyer et al. 2011; Meyer et al. 2016; Ferreira-Cerca 2017; Knüppel et al. 2018).  
114 Ultimately, the actions of these diverse factors facilitate the cooperative folding of different structures  
115 within the head domain of the SSU that are functionally crucial (Knüppel et al. 2018; Mitterer et al.  
116 2019; Parker et al. 2019; Huang et al. 2020; Huang and Karbstein 2021; Plassart et al. 2021). Moreover,  
117 during translation elongation, h31 (among other helices) is described as a conserved structural pivot  
118 point driving ribosomal subunit motion induced by the specific binding of the universally conserved  
119 translation elongation factor EF-G (known as aEF2 and eEF2 in archaea and eukaryotes, respectively)  
120 (Paci and Fox 2015; Paci and Fox 2016).

121 Eukaryotic Tsr3 sequence homologues are widely distributed in archaea (Ebersberger et al. 2014;  
122 Birikmen et al. 2021) and the presence of h31 modification (U-acp3) has been established in *Haloferax*

123 *volcanii* (Grosjean et al. 2008). Interestingly, the DPANN group shows sequence/structure variation in  
124 this region, which might significantly alter the maturation process of this helix (**Supplementary Figure**  
125 **1A and 1C**). Moreover, Tsr3 is not identified in most of these cellular contexts (Ebersberger et al. 2014;  
126 Mendler et al. 2019; Birikmen et al. 2021), thereby suggesting a similar evolutionary trajectory in the  
127 DPANN phylum of this functionally relevant region. In contrast, most of the Methanotecta superclass  
128 and the newly characterised Hikarchaeia show classical h31 structure/sequence and the presence of  
129 Tsr3 (see **Supplementary Figure 1A and 1C**) (Mendler et al. 2019). However, the Archaeoglobales and  
130 Methanonatroarchaeia seem to commonly lack Tsr3 (Mendler et al. 2019), and the  
131 Methanonatronarchaeia h31 additionally lacks the modified uridine at the expected position (see  
132 **Figure 1D**). Understanding functional consequences on Tsr3-dependent modification and ribosome  
133 function of this sequence/structural diversity will provide key information regarding the evolutionary  
134 plasticity of this region.

135 Another interesting example is the 330 Daltons rRNA modification of unknown chemical nature added  
136 by a yet unknown enzyme at the base of h44, on the third cytosine ( $C^{N330}$ ) ( $C_{1404}$  or  $C_{1352}$ , *E. coli* and *H.*  
137 *volcanii* numbering, respectively) of three conserved consecutive cytosines ( $C_{1402-4}$  or  $C_{1350-52}$ , *E. coli* and  
138 *H. volcanii* numbering, respectively) (Grosjean et al. 2008). This rRNA modification has been at least  
139 observed in the bacterium *Thermotoga maritima*, and the archaeon *Haloferax volcanii*, but not in  
140 eukaryotes (Guymon et al. 2007; Grosjean et al. 2008). Whereas the modified cytosine ( $C_{1404}$  or  $C_{1352}$ ,  
141 *E. coli* and *H. volcanii* numbering, respectively) is conserved in most archaea, it is mutated to a uridine  
142 in Nanohaloarchaea and some other DPANN members (see **Supplementary Figure 1A**). Whether the  
143 neighbouring cytosines ( $C_{1402-3}$  or  $C_{1350-51}$ , *E. coli* and *H. volcanii* numbering, respectively) can be  
144 modified instead or whether this modification is present at all, in this group of organisms, is not known.  
145 Although the role of the  $C^{N330}$  modification is not established, rRNA modifications and thus the  
146 respective enzymes are believed to fine-tune ribosome function (Decatur and Fournier 2002; Sloan et  
147 al. 2016 Dec 2). Therefore, perturbations of the substrate region might have significant consequences  
148 on cellular fitness and the evolutionary trajectories enabling this change may not be favourable. Again,  
149 in this context, the Nanohaloarchaea have a striking structural/sequence signature in a key strategical  
150 functional region of the SSU which more likely reflects a rather unique evolutionary history distinctive  
151 from other haloarchaea.

152 As illustrated above, the rRNA modifications and their respective molecular machinery, and very likely  
153 other fundamental aspects of ribosome biogenesis, are co-evolving with their respective rRNA  
154 substrates. Accordingly, the resulting evolutionary constraints and adaptations to maintain or modify  
155 these processes may help providing insights to support (or contradict) relative phylogenetic placement  
156 (see also discussion on the organisation of rRNA genes below). Particularly, the extent of shared

157 functional and structural converging features may provide additional arguments supporting the  
158 “functional plausibility” [see (Forterre 2015) and below] of unstable phylogenetic relationships, like  
159 e.g., the relative phylogenetic positioning of halophilic archaea discussed above. In our opinion, the  
160 examples mentioned are supportive of multiple origins of halophily.

161 Yet, going beyond the presented selected examples and expanding the functional evolutionary history  
162 towards more ribosomal constituents will be required to provide further insights into the archaeal  
163 evolutionary history. This endeavour is, however, mostly limited by our current understanding of  
164 ribosome biogenesis in archaea.

165

## 166 **Supplementary Text 2 | On the monophyly of Archaea: 1D vs 2D vs 3D and the ribosome** 167 **biogenesis viewpoint**

168 Not only can sequence/structural variations within the rRNA coding region provide phylogenetic  
169 information but also the sequences surrounding the mature SSU and LSU rRNA, i.e., the external and  
170 internal transcribed spacers that are part of the rRNA genes transcriptional unit (see **Supplementary**  
171 **Figure 4**). These sequence elements participate in the ribosome biogenesis process and are therefore  
172 under functional selection (Liang and Fournier 1997; Thomson et al. 2013; Henras et al. 2015; Davis  
173 and Williamson 2017; Ferreira-Cerca 2017; Baßler and Hurt 2019; Klinge and Woolford 2019; Jüttner  
174 et al. 2020; Londei and Ferreira-Cerca 2021). The rRNA spacers sequences contain important structural  
175 and sequence information required for rRNA processing (Jüttner et al. 2020; Zhang et al. 2020). The  
176 rationale behind utilising rRNA spacer sequences is that these sequences tend to diversify faster than  
177 the rRNA itself, but the underlying variations are still under sufficient selective constraint that could  
178 provide phylogenetic information. For example, the sequence of eukaryotic ITS2 separating the 5.8S  
179 rRNA and the 25/28S rRNA is used in phylogenetic analysis of eukaryotes (Koetschan et al. 2010; Zhang  
180 et al. 2020). This idea has also been embraced by the archaeal field, at least in its early days, and has  
181 been explored by the group of Roger Garrett (Kjems and Garrett 1990). In this early study, the emphasis  
182 was to establish structural models of rRNA spacer sequences at a time when the debate was more  
183 centred on establishing archaea as an independent domain of life. The secondary structure  
184 conservation analysis of the rRNA transcribed spacers has revealed that despite sequence diversity,  
185 these spacers adopt archaeal specific conserved structures that are distinguishable from the bacterial  
186 spacer structures (and the eukaryotic structures as well) (see **Supplementary Figure 4**). In other words,  
187 these analyses supported the monophyly of archaea (Kjems and Garrett 1990). Since the 1990s, a vast  
188 amount of completed genomes have become available and the time has probably come to revisit the  
189 sequence/structure information of these regions surrounding the rRNA and additionally employ RNA

190 structure-based phylogeny (Wolf et al. 2005; Lindgreen et al. 2006; Knies et al. 2008; Wolf et al. 2013).  
191 Furthermore, it is crucial to obtain information on the functional relevance and plasticity of these  
192 regions (Jüttner et al. 2020) and assess their utilisation in phylogenetic analysis.

193 The spacer sequences in modern eukaryotes have evolved in such a manner that any archaeal ancestry  
194 signal has been erased during the independent evolution of the eukaryotic lineage and the expansion  
195 of the eukaryotic ribosome biogenesis pathway. In the light of the newly defined Asgard archaea or  
196 DPANN, it is important to determine if these spacers regions are still structurally conserved across  
197 archaea, thereby further indicating a fundamental common trait of ribosome synthesis in archaea. We  
198 envision that the sequence/structure diversity of these flanking spacer regions may help stabilise  
199 phylogenetic relationships within archaea, like the origin of halophily and other still difficult  
200 phylogenetic placements (e.g., DPANN relationships).

201 In agreement with the work of the Garrett laboratory, the bacterial, archaeal and eukaryotic ribosomes  
202 and their ribosome biogenesis pathways are essentially distinguishable beyond any doubts as three  
203 different entities. They have more or less functional similarities that are reminiscent of 1) their  
204 respective close common ancestry, 2) similar inherited molecular constraints for which diverse  
205 molecular solutions have been (re)engineered at critical shared ancestral cellular nodes (Londei and  
206 Ferreira-Cerca 2021).

207 Recently, Cavalier-Smith (Cavalier-Smith and Chao 2020) and Devos (Devos 2021), have revisited a 1D  
208 model where archaea and eukarya would emerge from a common bacterial ancestor located within  
209 the PVC (Planctomycetes, Verrucomicrobia and Chlamydiae) superphylum, and strongly argue against  
210 previous criticisms that have challenged this concept (Cavalier-Smith and Chao 2020; Devos 2021). As  
211 mentioned above, only a sub-fraction of r-proteins are universally conserved and additional r-proteins  
212 are either specific to bacteria, archaea and/or eukaryotes, or only conserved between archaea and  
213 eukaryotes (Londei and Ferreira-Cerca 2021). Interestingly, although some r-proteins are non-  
214 homologous they are positioned into similar topological environments, thereby suggesting non-  
215 homologous convergent evolution (Forterre 2015; Cavalier-Smith and Chao 2020). From a ribosome  
216 biogenesis and function perspective, the main criticism of the 1D scenario is the non-homologous  
217 replacement of all the bacterial specific r-proteins (Forterre 2015; Cavalier-Smith and Chao 2020). In  
218 contrast, in a 2D/3D scenario, the universal ribosomal core (Melnikov et al. 2012) made by the  
219 universally conserved r-proteins would be essentially diversified into bacterial, archaeal and eukaryotic  
220 ribosomal subunits by acquisition/loss of r-proteins. In addition to previous arguments (Forterre 2015;  
221 Cavalier-Smith and Chao 2020), and unless assuming that all bacterial specific r-proteins were all  
222 functionally dispensable in the already evolved LUCA (Cavalier-Smith and Chao 2020), it is difficult to  
223 explain the absence of any remnants of these r-proteins in some cytosolic archaeal/eukaryotic

224 ribosomes. Similarly, it is equally difficult to explain the universal presence of functionally dispensable  
225 non-homologous r-proteins. Stepwise [see accretion model reviewed in (Petrov et al. 2015; Bowman  
226 et al. 2020)], convergent evolution stabilising important functional/structural features of the  
227 primordial ribosomal subunit, the universal core, appears in our opinion a more likely phenomenon of  
228 ribosome evolution.

229

230



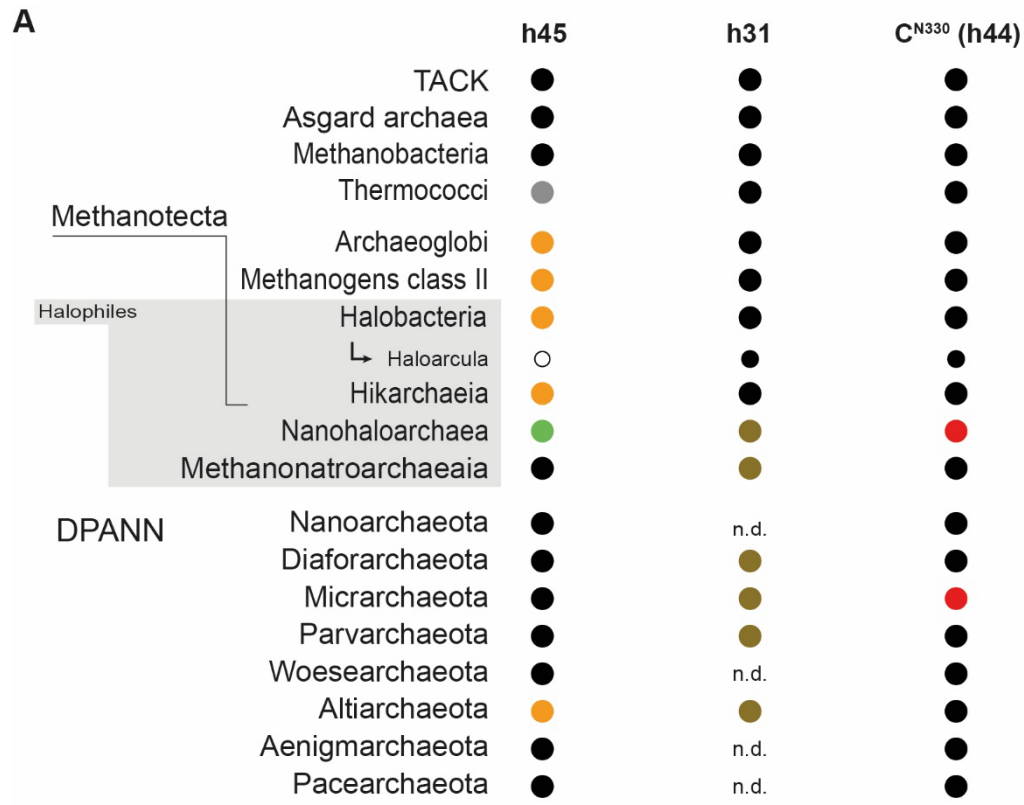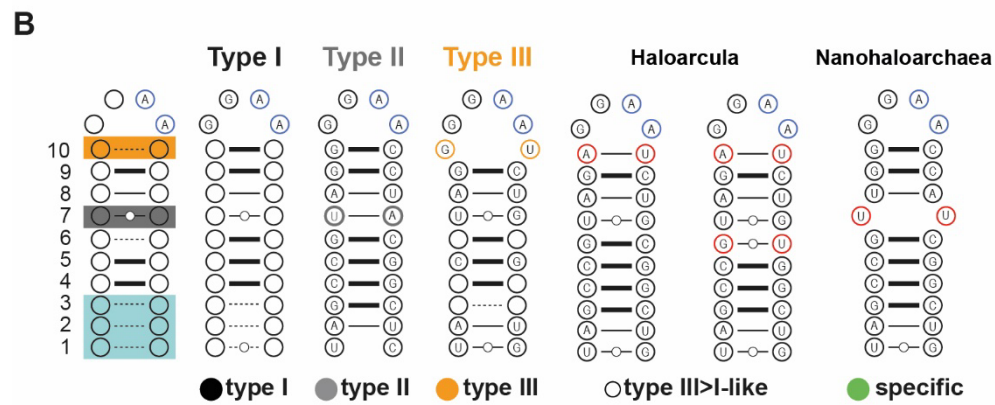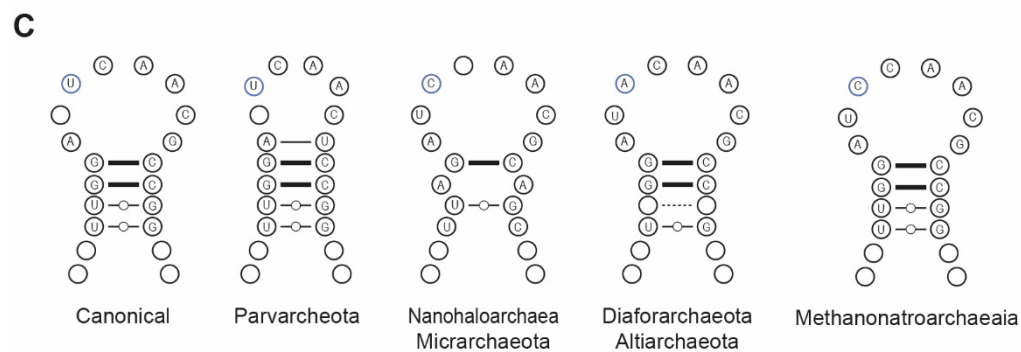

235 **Supplementary Figure 1 | Examples of rRNA sequence/structure changes highlighting archaeal**  
236 **phylogenetic diversity.**

237 **A) Examples of structure/sequence diversity of selected SSU features across archaea.**

238 Structure/sequence diversity of selected SSU structural features, like helix 45 and 31 (h45 and h31) or the C<sup>N330</sup>  
239 modification at the base of helix 44 [C<sup>N330</sup> (h44)] are depicted. Note that the chemical nature and enzyme  
240 responsible for the C<sup>N330</sup> RNA modification of an apparent size of 330 Daltons located at a conserved cytosine  
241 (C<sup>1404</sup> or C<sup>1352</sup>, *E. coli* and *H. volcanii* numbering, respectively) at the base of h44 is currently unknown. Black dot  
242 indicates the “canonical” structure/sequence commonly found in archaea. For helix 45 grey, orange, green and  
243 open dots indicate h45 structures/sequence subtypes found in the respective group of organisms. For helix 31  
244 and C<sup>N330</sup> (h44) modification non-canonical features are marked in brown and red, respectively. The  
245 corresponding structure/sequence features for h45 and h31 are depicted in more detail in panels C and D,  
246 respectively.

247 n.d.: indicates that the structure/sequence of the corresponding feature could not be determined  
248 unambiguously. All representative 16S rRNA sequences were obtained from DOE-JGI, NCBI and/or the SILVA  
249 database.

250 **B) 16S rRNA helix 45 secondary structure diversity across archaea.**

251 Archaea were classified into 3 major archaeal groups (type I, II and III) based on h45 sequence alignments and  
252 structure predictions of representative members of these groups (Knüppel et al. 2021). Base-pairing numbering  
253 (1-10) was annotated from the base of the h45 stem. When invariant the corresponding nucleotides and nature  
254 of the base-pairing (G-C larger line, A-U thinner line, or G●U dotted thinner line) are provided. Base pairing  
255 variability (G-C, A-U or G●U) is indicated by a dashed thinner line. An average representative archaeal h45  
256 structure based on all the compiled sequences is depicted (upper left) (Knüppel et al. 2021). Note that the first 6  
257 nucleotides forming the first 3 base pairs (indicated in blue) are relatively diverse in comparison to the almost  
258 invariant base-pairs at positions 4-6 and 8/9 across archaea. Variability at the G●U base-pairing at position 7  
259 observed in type II and at position 10 specific to the type III group are indicated in grey and orange, respectively.  
260 Additional, exemplary structural sub-types restricted to a subset of archaeal organisms are provided. Figure panel  
261 is modified from (Knüppel et al. 2021). All representative 16S rRNA sequences were obtained from DOE-JGI, NCBI  
262 and/or the SILVA database and secondary structure predictions were performed using the Vienna RNA web suite  
263 (Gruber et al. 2008). See (Knüppel et al. 2021) for additional details.

264 **C) 16S rRNA helix 31 secondary structure diversity across archaea.**

265 Selected exemplary sequences and associated secondary structure predictions found in the indicated organisms  
266 are provided. Same as in panel C) secondary structure predictions were performed on selected 16S rRNA  
267 sequences as described above. Blue circled nucleotide indicates the position of the U-acp3 modification. Note  
268 the absence of uridine at this specific position in a subset of archaeal organisms.

269

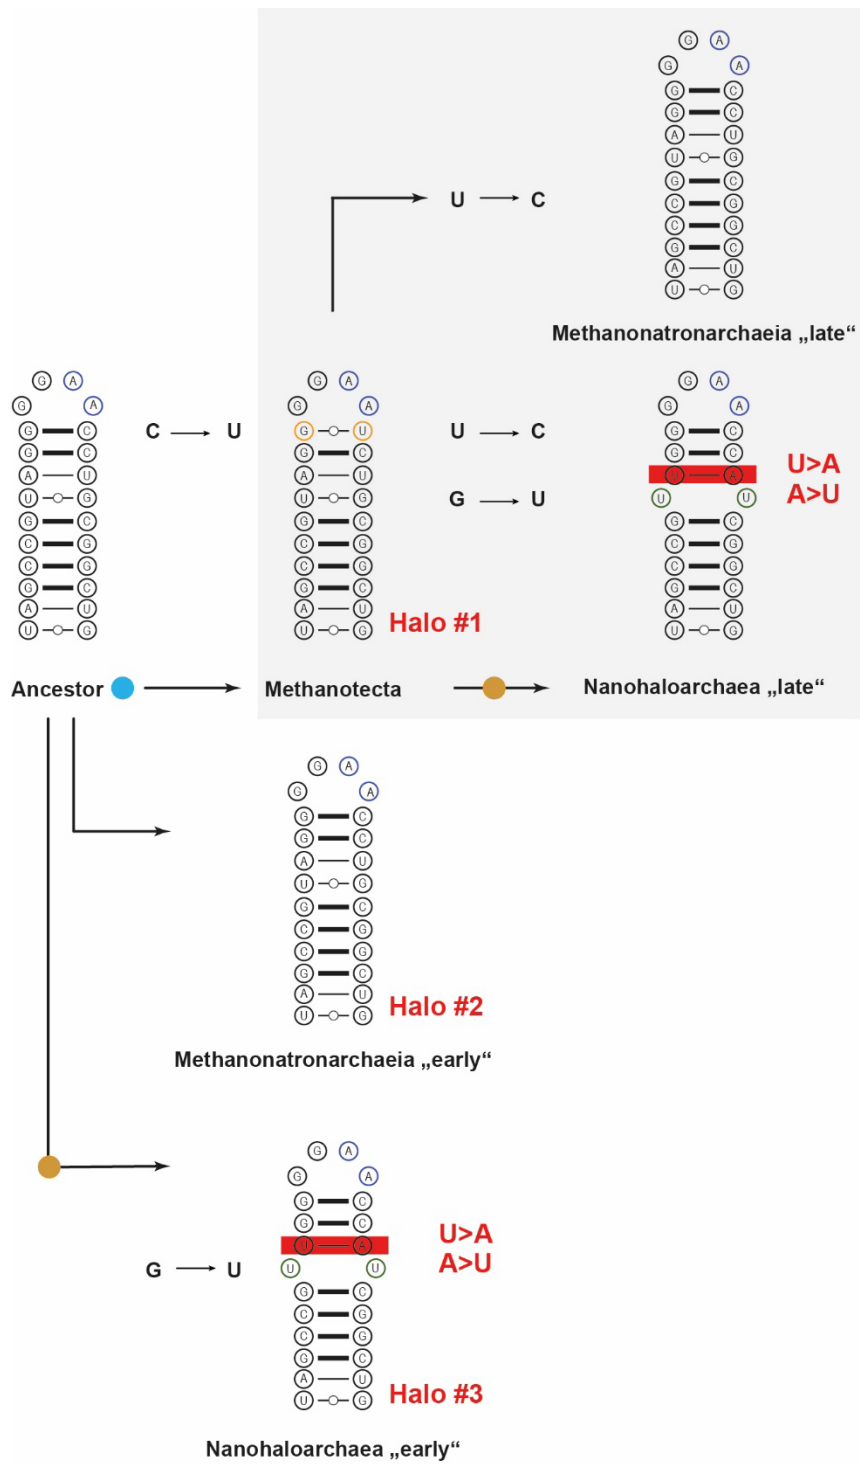

271

272

273 **Supplementary Figure 2 |Putative evolutionary trajectories of h45 structure/sequence across**  
274 **halophilic archaea.** Putative evolutionary trajectories of h45 from a common ancestor according to the  
275 different evolutionary scenarios of halophily origins. Note that the structure/sequence of the common ancestor  
276 is supported by the prevalence of this structure/sequence across archaea but may still be arbitrary. Necessary  
277 nucleotide exchanges are indicated. Note that in a monophyletic scenario of halophily, the Methanotecta  
278 hallmark (G-U base pairing at the tip of h45, indicated in orange) which modifies the ksgA/Dim1-dependent  
279 modification pattern (Knüppel et al. 2021), needs to be reversed multiple times to accommodate this  
280 evolutionary trajectory. The universally conserved and modified (demethylated) adenosines are indicated in  
281 blue. Base pairing flip A-U to U-A is underlined in red. The biological consequences of the h45 partial opening in  
282 Nanohaloarchaea are currently unknown. Blue and brown dots indicate the presence of linked and unlinked 16S-  
283 23S rRNA genes, respectively.

284

285

286

287

288

289

290

291

292

293

294

295

296

297

298

299

300

301

302

303

304

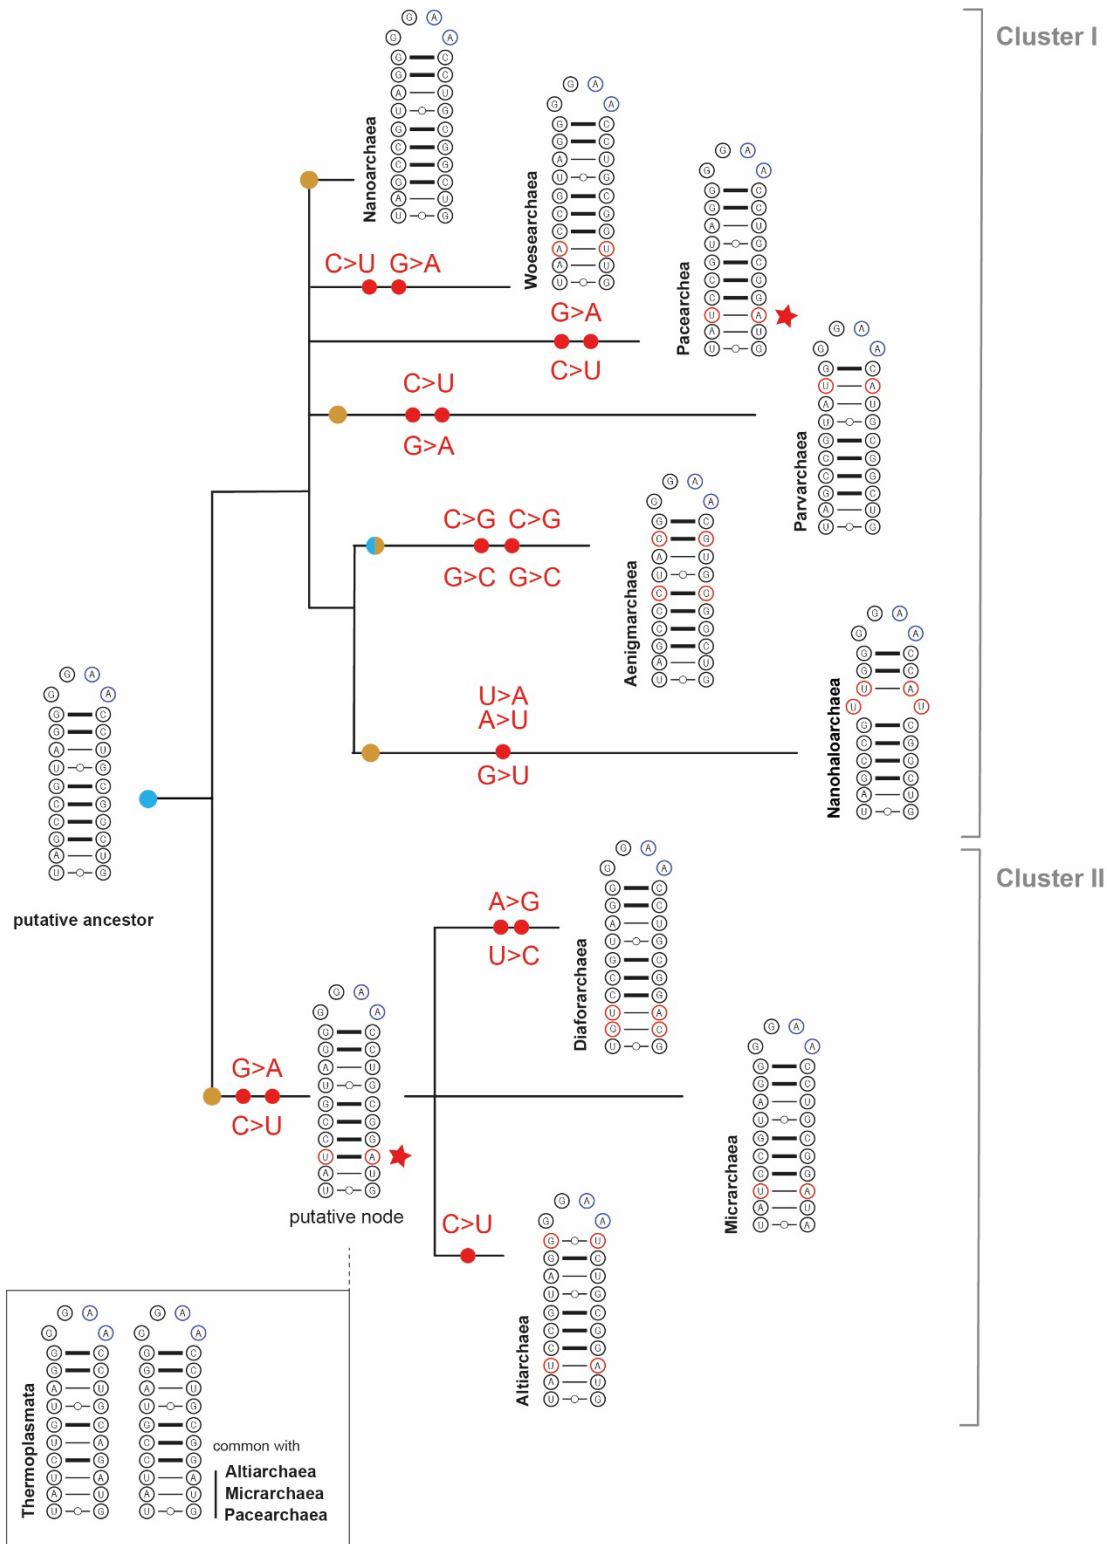

306

307

308 **Supplementary Figure 3 | h45 structure/sequence variations across the DPANN superphylum.**

309 Putative evolutionary trajectories of h45 within the DPANN superphylum according to Dombrowski's recent  
310 phylogeny (Dombrowski et al. 2020). Note that the structure/sequence of the common ancestor is supported by  
311 the prevalence of this structure/sequence across archaea but may be still arbitrary. Necessary nucleotide  
312 exchanges are indicated. Note the structure similarity of structure/sequence of the Pacearchaea and the  
313 common ancestor of Cluster II and Thermoplasmatales (red star), indicative of a common or convergent  
314 evolutionary history of the h45 structure/sequence. The universally conserved and modified adenosines are  
315 indicated in blue. Base pairing flip A-U to U-A is underlined in red. The biological consequences of the h45 partial  
316 opening in Nanohaloarchaea are currently unknown. Blue and brown dots indicate the presence of linked and  
317 unlinked 16S-23S rRNA genes, respectively. The presence of either linked or unlinked rRNA genes organisation  
318 in different individual organisms classified as Aegnimarchaea is indicated by a half blue/brown dot.

319

320 **Supplementary Figure 4**

321

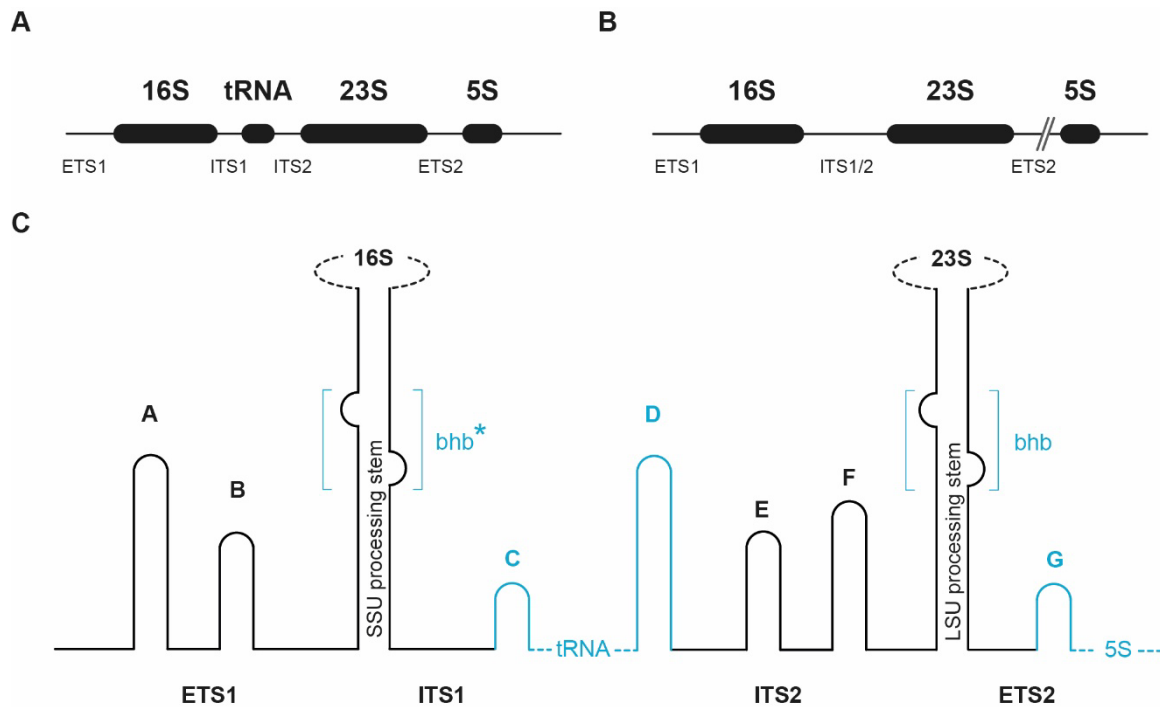

322

323

324 **Supplementary Figure 4 | Typical rRNA genes organisation in archaea**

325 **A) Typical rRNA genes organisation in Euryarchaeota**

326 Ribosomal RNA transcriptional unit architecture containing the 16S rRNA, tRNA, 23S rRNA and 5S rRNA separated  
327 by transcribed spacers typically found in Euryarchaeota is depicted.

328 **B) Typical rRNA genes organisation in Crenarchaeota**

329 Same as in panel A) except that the 16S and 23S rRNAs are not separated by a tRNA, and the 5S rRNA can, in  
330 some cases, be unlinked from the main transcriptional unit as indicated by the //.

331 **C) Conserved structural elements found in the rRNA spacer sequences in archaea.**

332 Schematic representation of conserved structural elements found in the rRNA spacers sequences, based on  
333 (Kjems and Garrett 1990), are depicted. Note the presence of helix A, B, E and F and the processing stems of the  
334 SSU and LSU in both Euryarchaeota and Crenarchaeota analysed, whereas helix C, D and G (indicated in blue) are  
335 presumably restricted to Euryarchaeota (Kjems and Garrett 1990). The processing stems are cleaved at the bulge-  
336 helix bulge motif (bhb) by the tRNA splicing endonuclease, a step required for the formation of archaeal-specific  
337 circular rRNA precursor intermediates (Jüttner et al. 2020; Qi et al. 2020 May 23; Schwarz et al. 2020). Note that  
338 the 16S bhb is absent or not well predicted in various archaea and is indicated with an \* (Kjems and Garrett 1990;  
339 Jüttner et al. 2020; Qi et al. 2020 May 23). The size and the exact structure of the different helices vary between  
340 the organisms analysed (Kjems and Garrett 1990). ETS1: external transcribed spacer 1; ITS1: internal transcribed  
341 spacer 1; ETS2: external transcribed spacer 2; ITS2: internal transcribed spacer 2.

## 342 **Supplementary References**

- 343 Aouad M, Borrel G, Brochier-Armanet C, Gribaldo S. 2019. Evolutionary placement of Methanonatronarchaea.  
344 *Nature Microbiology*. 4(4):558–559. doi:10.1038/s41564-019-0359-z.
- 345 Aouad M, Taib N, Oudart A, Lecocq M, Gouy M, Brochier-Armanet C. 2018. Extreme halophilic archaea derive  
346 from two distinct methanogen Class II lineages. *Molecular Phylogenetics and Evolution*. 127:46–54.  
347 doi:10.1016/j.ympev.2018.04.011.
- 348 Baßler J, Hurt E. 2019. Eukaryotic Ribosome Assembly. *Annu Rev Biochem*. 88(1):281–306. doi:10.1146/annurev-  
349 biochem-013118-110817.
- 350 Birikmen M, Bohnsack KE, Tran V, Somayaji S, Bohnsack MT, Ebersberger I. 2021. Tracing Eukaryotic Ribosome  
351 Biogenesis Factors Into the Archaeal Domain Sheds Light on the Evolution of Functional Complexity. *Frontiers in*  
352 *Microbiology*. 12:2598. doi:10.3389/fmicb.2021.739000.
- 353 Bowman JC, Petrov AS, Frenkel-Pinter M, Penev PI, Williams LD. 2020. Root of the Tree: The Significance,  
354 Evolution, and Origins of the Ribosome. *Chem Rev*. 120(11):4848–4878. doi:10.1021/acs.chemrev.9b00742.
- 355 Castelle CJ, Banfield JF. 2018. Major New Microbial Groups Expand Diversity and Alter our Understanding of the  
356 Tree of Life. *Cell*. 172(6):1181–1197. doi:10.1016/j.cell.2018.02.016.
- 357 Castelle CJ, Brown CT, Anantharaman K, Probst AJ, Huang RH, Banfield JF. 2018. Biosynthetic capacity, metabolic  
358 variety and unusual biology in the CPR and DPANN radiations. *Nature Reviews Microbiology*. 16(10):629–645.  
359 doi:10.1038/s41579-018-0076-2.
- 360 Cavalier-Smith T, Chao EE-Y. 2020. Multidomain ribosomal protein trees and the planctobacterial origin of  
361 neomura (eukaryotes, archaeobacteria). *Protoplasma*. 257(3):621–753. doi:10.1007/s00709-019-01442-7.
- 362 Davis JH, Williamson JR. 2017. Structure and dynamics of bacterial ribosome biogenesis. *Philos Trans R Soc Lond*  
363 *B Biol Sci*. 372(1716):20160181. doi:10.1098/rstb.2016.0181.
- 364 Decatur WA, Fournier MJ. 2002. rRNA modifications and ribosome function. *Trends in Biochemical Sciences*.  
365 27(7):344–351. doi:10.1016/S0968-0004(02)02109-6.
- 366 Demirci H, Murphy F, Belardinelli R, Kelley AC, Ramakrishnan V, Gregory ST, Dahlberg AE, Jogl G. 2010.  
367 Modification of 16S ribosomal RNA by the KsgA methyltransferase restructures the 30S subunit to optimize  
368 ribosome function. *RNA*. 16(12):2319–2324. doi:10.1261/rna.2357210.
- 369 Devos DP. 2021. Reconciling Asgardarchaeota Phylogenetic Proximity to Eukaryotes and Planctomycetes Cellular  
370 Features in the Evolution of Life. *Molecular Biology and Evolution*.(msab186). doi:10.1093/molbev/msab186.  
371 [accessed 2021 Feb 8]. <https://doi.org/10.1093/molbev/msab186>.
- 372 Dombrowski N, Lee J-H, Williams TA, Offre P, Spang A. 2019. Genomic diversity, lifestyles and evolutionary origins  
373 of DPANN archaea. *FEMS Microbiology Letters*. 366(2). doi:10.1093/femsle/fnz008. [accessed 2021 Jul 30].  
374 <https://doi.org/10.1093/femsle/fnz008>.
- 375 Dombrowski N, Williams TA, Sun J, Woodcroft BJ, Lee J-H, Minh BQ, Rinke C, Spang A. 2020. Undinarchaeota  
376 illuminate DPANN phylogeny and the impact of gene transfer on archaeal evolution. *Nature Communications*.  
377 11(1):3939. doi:10.1038/s41467-020-17408-w.
- 378 Ebersberger I, Simm S, Leisegang MS, Schmitzberger P, Mirus O, von Haeseler A, Bohnsack MT, Schleiff E. 2014.  
379 The evolution of the ribosome biogenesis pathway from a yeast perspective. *Nucleic Acids Research*. 42(3):1509–  
380 1523. doi:10.1093/nar/gkt1137.
- 381 Feng Y, Neri U, Gosselin S, Louyakis AS, Papke RT, Gophna U, Gogarten JP. 2021. The evolutionary origins of  
382 extreme halophilic Archaeal lineages. *Genome Biology and Evolution*.(evab166). doi:10.1093/gbe/evab166.  
383 [accessed 2021 Jul 30]. <https://doi.org/10.1093/gbe/evab166>.



384 Ferreira-Cerca S. 2017. Life and Death of Ribosomes in Archaea. In: Clouet-d'Orval B, editor. RNA Metabolism  
385 and Gene Expression in Archaea. Cham: Springer International Publishing. p. 129–158.  
386 [https://doi.org/10.1007/978-3-319-65795-0\\_6](https://doi.org/10.1007/978-3-319-65795-0_6).

387 Fischer N, Neumann P, Konevega AL, Bock LV, Ficner R, Rodnina MV, Stark H. 2015. Structure of the E. coli  
388 ribosome-EF-Tu complex at <3 Å resolution by Cs-corrected cryo-EM. *Nature*. 520(7548):567–570.

389 Formenoy LJ, Cunningham PR, Nurse K, Pleij CWA, Ofengand J. 1994. Methylation of the conserved A1518-A1519  
390 in Escherichia coli 16S ribosomal RNA by the ksgA methyltransferase is influenced by methylations around the  
391 similarly conserved U1512-G1523 base pair in the 3' terminal hairpin. *Biochimie*. 76(12):1123–1128.  
392 doi:10.1016/0300-9084(94)90040-X.

393 Forterre P. 2015. The universal tree of life: an update. *Frontiers in Microbiology*. 6:717.  
394 doi:10.3389/fmicb.2015.00717.

395 van Gemen B, Koets H, Plooy C, Bodlaender J, Van Knippenberg P. 1987. Characterization of the ksgA gene of  
396 Escherichia coli determining kasugamycin sensitivity. *Biochimie*. 69(8):841–848. doi:10.1016/0300-  
397 9084(87)90210-0.

398 Grosjean H, Gaspin C, Marck C, Decatur WA, de Crécy-Lagard V. 2008. RNomics and Modomics in the halophilic  
399 archaea Haloferax volcanii: identification of RNA modification genes. *BMC Genomics*. 9:470–470.  
400 doi:10.1186/1471-2164-9-470.

401 Gruber AR, Lorenz R, Bernhart SH, Neuböck R, Hofacker IL. 2008. The Vienna RNA Websuite. *Nucleic Acids  
402 Research*. 36(suppl\_2):W70–W74. doi:10.1093/nar/gkn188.

403 Guymon R, Pomerantz SC, Ison JN, Crain PF, McCloskey JA. 2007. Post-transcriptional modifications in the small  
404 subunit ribosomal RNA from Thermotoga maritima, including presence of a novel modified cytidine. *RNA*.  
405 13(3):396–403. doi:10.1261/rna.361607.

406 Hamm JN, Erdmann S, Eloë-Fadrosch EA, Angeloni A, Zhong L, Brownlee C, Williams TJ, Barton K, Carswell S, Smith  
407 MA, et al. 2019. Unexpected host dependency of Antarctic Nanohaloarchaeota. *Proc Natl Acad Sci USA*.  
408 116(29):14661. doi:10.1073/pnas.1905179116.

409 Henras AK, Plisson-Chastang C, O'Donohue M-F, Chakraborty A, Gleizes P-E. 2015. An overview of pre-ribosomal  
410 RNA processing in eukaryotes. *WIREs RNA*. 6(2):225–242. doi:10.1002/wrna.1269.

411 Huang H, Ghalei H, Karbstein K. 2020. Quality control of 40S ribosome head assembly ensures scanning  
412 competence. *J Cell Biol*. 219(11):e202004161. doi:10.1083/jcb.202004161.

413 Huang H, Karbstein K. 2021. Assembly factors chaperone ribosomal RNA folding by isolating helical junctions that  
414 are prone to misfolding. *Proc Natl Acad Sci USA*. 118(25):e2101164118. doi:10.1073/pnas.2101164118.

415 Jüttner M, Weiß M, Ostheimer N, Reglin C, Kern M, Knüppel R, Ferreira-Cerca S. 2020. A versatile cis-acting  
416 element reporter system to study the function, maturation and stability of ribosomal RNA mutants in archaea.  
417 *Nucleic Acids Res*. 48(4):2073–2090. doi:10.1093/nar/gkz1156.

418 Kjems J, Garrett RA. 1990. Secondary structural elements exclusive to the sequences flanking ribosomal RNAs  
419 lend support to the monophyletic nature of the archaeobacteria. *Journal of Molecular Evolution*. 31(1):25–32.  
420 doi:10.1007/BF02101789.

421 Klinge S, Woolford JL. 2019. Ribosome assembly coming into focus. *Nature Reviews Molecular Cell Biology*.  
422 20(2):116–131. doi:10.1038/s41580-018-0078-y.

423 Knies JL, Dang KK, Vision TJ, Hoffman NG, Swanstrom R, Burch CL. 2008. Compensatory Evolution in RNA  
424 Secondary Structures Increases Substitution Rate Variation among Sites. *Molecular Biology and Evolution*.  
425 25(8):1778–1787. doi:10.1093/molbev/msn130.

426 Knüppel R, Christensen RH, Gray FC, Esser D, Strauß D, Medenbach J, Siebers B, MacNeill SA, LaRonde N, Ferreira-  
427 Cerca S. 2018. Insights into the evolutionary conserved regulation of Rio ATPase activity. *Nucleic Acids Research*.  
428 46(3):1441–1456. doi:10.1093/nar/gkx1236.

429 Knüppel R, Trahan C, Kern M, Wagner A, Grünberger F, Hausner W, Quax TEF, Albers S-V, Oeffinger M, Ferreira-  
430 Cerca S. 2021. Insights into synthesis and function of KsgA/Dim1-dependent rRNA modifications in archaea.  
431 *Nucleic Acids Res*. 49(3):1662–1687. doi:10.1093/nar/gkaa1268.

432 Koetschan C, Förster F, Keller A, Schleicher T, Ruderisch B, Schwarz R, Müller T, Wolf M, Schultz J. 2010. The ITS2  
433 Database III—sequences and structures for phylogeny. *Nucleic Acids Research*. 38(suppl\_1):D275–D279.  
434 doi:10.1093/nar/gkp966.

435 Lafontaine D, Delcour J, Glasser A-L, Desgres J, Vandenhoute J. 1994. The DIM1 Gene Responsible for the  
436 Conserved m62Am62A Dimethylation in the 3'-Terminal Loop of 18 S rRNA is Essential in Yeast. *Journal of*  
437 *Molecular Biology*. 241(3):492–497. doi:10.1006/jmbi.1994.1525.

438 Lesnyak DV, Osipiuk J, Skarina T, Sergiev PV, Bogdanov AA, Edwards A, Savchenko A, Joachimiak A, Dontsova OA.  
439 2007. Methyltransferase That Modifies Guanine 966 of the 16 S rRNA: FUNCTIONAL IDENTIFICATION AND  
440 TERTIARY STRUCTURE. *The Journal of biological chemistry*. 282(8):5880–5887. doi:10.1074/jbc.M608214200.

441 Li Z, Lee I, Moradi E, Hung N-J, Johnson AW, Marcotte EM. 2009. Rational extension of the ribosome biogenesis  
442 pathway using network-guided genetics. *PLoS Biol*. 7(10):e1000213–e1000213.  
443 doi:10.1371/journal.pbio.1000213.

444 Liang W-Q, Fournier MJ. 1997. Synthesis of functional eukaryotic ribosomal RNAs in trans: Development of a  
445 novel in vivo rDNA system for dissecting ribosome biogenesis. *Proceedings of the National Academy of Sciences*  
446 *of the United States of America*. 94(7):2864–2868.

447 Lindgreen S, Gardner PP, Krogh A. 2006. Measuring covariation in RNA alignments: physical realism improves  
448 information measures. *Bioinformatics*. 22(24):2988–2995. doi:10.1093/bioinformatics/btl514.

449 Londei P, Ferreira-Cerca S. 2021. Ribosome Biogenesis in Archaea. *Frontiers in Microbiology*. 12:1476.  
450 doi:10.3389/fmicb.2021.686977.

451 Martijn J, Schön ME, Lind AE, Vosseberg J, Williams TA, Spang A, Ettema TJG. 2020. Hikarchaeia demonstrate an  
452 intermediate stage in the methanogen-to-halophile transition. *Nat Commun*. 11(1):5490–5490.  
453 doi:10.1038/s41467-020-19200-2.

454 Melnikov S, Ben-Shem A, Garreau de Loubresse N, Jenner L, Yusupova G, Yusupov M. 2012. One core, two shells:  
455 bacterial and eukaryotic ribosomes. *Nat Struct Mol Biol*. 19(6):560–567. doi:10.1038/nsmb.2313.

456 Mandler K, Chen H, Parks DH, Lobb B, Hug LA, Doxey AC. 2019. AnnoTree: visualization and exploration of a  
457 functionally annotated microbial tree of life. *Nucleic Acids Research*. 47(9):4442–4448. doi:10.1093/nar/gkz246.

458 Meyer B, Wurm JP, Kötter P, Leisegang MS, Schilling V, Buchhaupt M, Held M, Bahr U, Karas M, Heckel A, et al.  
459 2011. The Bowen–Conradi syndrome protein Nep1 (Emg1) has a dual role in eukaryotic ribosome biogenesis, as  
460 an essential assembly factor and in the methylation of Ψ1191 in yeast 18S rRNA. *Nucleic Acids Research*.  
461 39(4):1526–1537. doi:10.1093/nar/gkq931.

462 Meyer B, Wurm JP, Sharma S, Immer C, Pogoryelov D, Kötter P, Lafontaine DLJ, Wöhnert J, Entian K-D. 2016.  
463 Ribosome biogenesis factor Tsr3 is the aminocarboxypropyl transferase responsible for 18S rRNA  
464 hypermodification in yeast and humans. *Nucleic Acids Research*. 44(9):4304–4316. doi:10.1093/nar/gkw244.

465 Mitterer V, Shayan R, Ferreira-Cerca S, Murat G, Enne T, Rinaldi D, Weigl S, Omanic H, Gleizes P-E, Kressler D, et  
466 al. 2019. Conformational proofreading of distant 40S ribosomal subunit maturation events by a long-range  
467 communication mechanism. *Nat Commun*. 10(1):2754–2754. doi:10.1038/s41467-019-10678-z.

468 Narasingarao P, Podell S, Ugalde JA, Brochier-Armanet C, Emerson JB, Brocks JJ, Heidelberg KB, Banfield JF, Allen  
469 EE. 2012. De novo metagenomic assembly reveals abundant novel major lineage of Archaea in hypersaline  
470 microbial communities. *The ISME Journal*. 6(1):81–93. doi:10.1038/ismej.2011.78.

471 Nei M. 2005. Selectionism and Neutralism in Molecular Evolution. *Molecular Biology and Evolution*. 22(12):2318–  
472 2342. doi:10.1093/molbev/msi242.

473 Paci M, Fox GE. 2015. Major centers of motion in the large ribosomal RNAs. *Nucleic Acids Research*. 43(9):4640–  
474 4649. doi:10.1093/nar/gkv289.

475 Paci M, Fox GE. 2016. Centers of motion associated with EF-Tu binding to the ribosome. *RNA Biol*. 13(5):524–  
476 530. doi:10.1080/15476286.2015.1114204.

477 Parker MD, Collins JC, Korona B, Ghalei H, Karbstein K. 2019. A kinase-dependent checkpoint prevents escape of  
478 immature ribosomes into the translating pool. *PLoS Biol*. 17(12):e3000329–e3000329.  
479 doi:10.1371/journal.pbio.3000329.

480 Petitjean C, Deschamps P, López-García P, Moreira D. 2014. Rooting the domain archaea by phylogenomic  
481 analysis supports the foundation of the new kingdom Proteoarchaeota. *Genome Biol Evol*. 7(1):191–204.  
482 doi:10.1093/gbe/evu274.

483 Petrov AS, Gulen B, Norris AM, Kovacs NA, Bernier CR, Lanier KA, Fox GE, Harvey SC, Wartell RM, Hud NV, et al.  
484 2015. History of the ribosome and the origin of translation. *Proc Natl Acad Sci USA*. 112(50):15396.  
485 doi:10.1073/pnas.1509761112.

486 Piekna-Przybylska D, Decatur WA, Fournier MJ. 2008. The 3D rRNA modification maps database: with interactive  
487 tools for ribosome analysis. *Nucleic Acids Research*. 36(suppl 1):D178–D183. doi:10.1093/nar/gkm855.

488 Plassart L, Shayan R, Montellese C, Rinaldi D, Larburu N, Pichereaux C, Froment C, Lebaron S, O'Donohue M-F,  
489 Kutay U, et al. 2021. The final step of 40S ribosomal subunit maturation is controlled by a dual key lock. *Elife*.  
490 10:e61254. doi:10.7554/eLife.61254.

491 Poldermans B, Roza L, Van Knippenberg PH. 1979. Studies on the function of two adjacent N6,N6-  
492 dimethyladenosines near the 3' end of 16 S ribosomal RNA of *Escherichia coli*. III. Purification and properties of  
493 the methylating enzyme and methylase-30 S interactions. *Journal of Biological Chemistry*. 254(18):9094–9100.

494 Qi L, Li J, Jia J, Yue L, Dong X. 2020 May 23. Comprehensive analysis of the pre-ribosomal RNA maturation pathway  
495 in a methanoarchaeon exposes the conserved circularization and linearization mode in archaea. *RNA Biology*.:1–  
496 15. doi:10.1080/15476286.2020.1771946.

497 Schwarz TS, Berkemer SJ, Bernhart SH, Weiß M, Ferreira-Cerca S, Stadler PF, Marchfelder A. 2020. Splicing  
498 Endonuclease Is an Important Player in rRNA and tRNA Maturation in Archaea. *Front Microbiol*. 11:594838–  
499 594838. doi:10.3389/fmicb.2020.594838.

500 Sloan KE, Warda AS, Sharma S, Entian K-D, Lafontaine DLJ, Bohnsack MT. 2016 Dec 2. Tuning the ribosome: The  
501 influence of rRNA modification on eukaryotic ribosome biogenesis and function. *RNA Biology*.:1–16.  
502 doi:10.1080/15476286.2016.1259781.

503 Sorokin DY, Makarova KS, Abbas B, Ferrer M, Golyshin PN, Galinski EA, Ciorda S, Mena MC, Merkel AY, Wolf YI,  
504 et al. 2019. Reply to 'Evolutionary placement of Methanonatronarchaea.' *Nature Microbiology*. 4(4):560–561.  
505 doi:10.1038/s41564-019-0358-0.

506 Sorokin DY, Makarova KS, Abbas B, Ferrer M, Golyshin PN, Galinski EA, Ciordia S, Mena MC, Merkel AY, Wolf YI,  
507 et al. 2017. Discovery of extremely halophilic, methyl-reducing euryarchaea provides insights into the  
508 evolutionary origin of methanogenesis. *Nat Microbiol*. 2:17081–17081. doi:10.1038/nmicrobiol.2017.81.

509 Spang A, Caceres EF, Ettema TJG. 2017. Genomic exploration of the diversity, ecology, and evolution of the  
510 archaeal domain of life. *Science*. 357(6351):eaaf3883. doi:10.1126/science.aaf3883.

511 Tahon G, Patricia Geesink, Ettema TJG. 2021 Sep 8. Expanding Archaeal Diversity and Phylogeny: Past, Present,  
512 and Future. *Annu Rev Microbiol*. doi:10.1146/annurev-micro-040921-050212. [accessed 2021 Aug 6].  
513 <https://doi.org/10.1146/annurev-micro-040921-050212>.

514 Thomson E, Ferreira-Cerca S, Hurt E. 2013. Eukaryotic ribosome biogenesis at a glance. *J Cell Sci*. 126(21):4815.  
515 doi:10.1242/jcs.111948.

516 Van Charldorp R, Heus HA, Knippenberg PHV, Joordens J, De Bruin SH, Hilbers CW. 1981. Destabilization of  
517 secondary structure in 16S ribosomal RNA by dimethylation of two adjacent adenosines. *Nucleic Acids Research*.  
518 9(17):4413–4422. doi:10.1093/nar/9.17.4413.

519 Williams TA, Szöllősi GJ, Spang A, Foster PG, Heaps SE, Boussau B, Ettema TJG, Embley TM. 2017. Integrative  
520 modeling of gene and genome evolution roots the archaeal tree of life. *Proc Natl Acad Sci USA*. 114(23):E4602.  
521 doi:10.1073/pnas.1618463114.

522 Wolf M, Chen S, Song J, Ankenbrand M, Müller T. 2013. Compensatory Base Changes in ITS2 Secondary Structures  
523 Correlate with the Biological Species Concept Despite Intragenomic Variability in ITS2 Sequences – A Proof of  
524 Concept. *PLOS ONE*. 8(6):e66726. doi:10.1371/journal.pone.0066726.

525 Wolf M, Friedrich J, Dandekar T, Müller T. 2005. CBCAnalyzer: Inferring Phylogenies Based on Compensatory Base  
526 Changes in RNA Secondary Structures. *In Silico Biology*. 5(3):291–294.

527 Wurm JP, Meyer B, Bahr U, Held M, Frolow O, Kötter P, Engels JW, Heckel A, Karas M, Entian K-D, et al. 2010. The  
528 ribosome assembly factor Nep1 responsible for Bowen–Conradi syndrome is a pseudouridine-N1-specific  
529 methyltransferase. *Nucleic Acids Research*. 38(7):2387–2398. doi:10.1093/nar/gkp1189.

530 Zhang W, Tian W, Gao Z, Wang G, Zhao H. 2020. Phylogenetic Utility of rRNA ITS2 Sequence-Structure under  
531 Functional Constraint. *International Journal of Molecular Sciences*. 21(17). doi:10.3390/ijms21176395.

532

533

## 534 **Supplementary Note**

### 535 **Relative distribution of linked and unlinked rRNA genes organisation in archaea**

536 It is currently difficult to accurately assess the numbers and distribution of unlinked and linked rRNA  
537 genes organisation across archaea. Some of the current limitations to do so are highlighted below:

538 1) The quality of the data analysed

539 As mentioned in the main text rRNA genes assembly are particularly challenging when performed from  
540 short-read metagenomics datasets. High quality complete (closed) genomes ideally obtained from  
541 enriched/pure cultures or long reads sequencing technologies provide more accurate genomes  
542 assembly. However, the amounts of such genomes remain limited for archaea.

543 2) Representativity of the available data

544 The available data may be biased due to scientific focus and feasibility. These parameters influence  
545 sampling strategies, like the type of sampled environments and ultimately the type of data that are  
546 available (or missing). High-quality genomes assemblies are also predominantly available for organisms  
547 that are easily amenable to enrichment/pure cultures.

548 The relative distribution across archaea of linked/unlinked rRNA genes organisation can be assessed  
549 based on the recent study of Brewer and collaborators.

550 This study has analysed rRNA genes organisation using two types of data: those available at NCBI (up  
551 to January 2019) and long-reads sequencing from different types of selected environments.

552 According to this study, less than 5 % of the TACK superphylum (~75 total analysed) and slightly more  
553 than 5% in Euryarchaeota (~200 total analysed) of the “complete” genomes deposited in the NCBI  
554 database are unlinked (>12,000 genomes of bacteria and archaea were analysed, archaea representing  
555 a very small portion of these).

556 In the same study and based on long-read sequencing data: 50% of the TACK (46 total analysed) and  
557 slightly more than 5% of the Euryarchaeota (433 in total analysed) have unlinked rRNA genes  
558 organisation.

559 If combining both datasets, around 22% of the TACK superphylum and 7.5% of the Euryarchaeota  
560 analysed have unlinked rRNA genes.

561 From this example, it is expected that these relative numbers will be substantially revised in the coming  
562 years. However, large amounts of high-quality data across diverse biotopes will be necessary to  
563 minimize possible distribution bias.

564

565



586 [https://img.jgi.doe.gov/cgi-](https://img.jgi.doe.gov/cgi-bin/m/main.cgi?section=ScaffoldGraph&page=scaffoldGraph&scaffold_oid=2740901964&start_coord=1&end_coord=14619&marker_gene=2741395577&seq_length=14619)  
587 [bin/m/main.cgi?section=ScaffoldGraph&page=scaffoldGraph&scaffold\\_oid=2740901964&start\\_coord=1&end\\_coord=14619&marker\\_gene=2741395577&seq\\_length=14619](https://img.jgi.doe.gov/cgi-bin/m/main.cgi?section=ScaffoldGraph&page=scaffoldGraph&scaffold_oid=2740901964&start_coord=1&end_coord=14619&marker_gene=2741395577&seq_length=14619)

589 - Neighbourhood:

590 [https://img.jgi.doe.gov/cgi-](https://img.jgi.doe.gov/cgi-bin/m/main.cgi?section=GeneDetail&page=geneDetail&gene_oid=2741395578)  
591 [bin/m/main.cgi?section=GeneDetail&page=geneDetail&gene\\_oid=2741395578](https://img.jgi.doe.gov/cgi-bin/m/main.cgi?section=GeneDetail&page=geneDetail&gene_oid=2741395578)

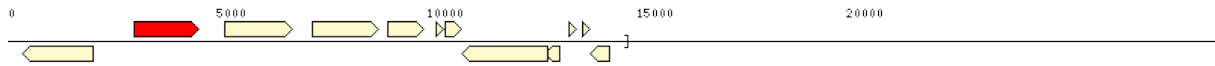

592  
593 351-2030: Hypothetical protein

594 **3022-4565: 16S rRNA**

595 5183-6772: Hypothetical protein

596 7247-8836: Hypothetical protein

597

## 598 **Heimdallarchaeota archaeon RS678**

599 Overview:

600 [https://img.jgi.doe.gov/cgi-](https://img.jgi.doe.gov/cgi-bin/m/main.cgi?section=TaxonDetail&page=taxonDetail&taxon_oid=2778261486)  
601 [bin/m/main.cgi?section=TaxonDetail&page=taxonDetail&taxon\\_oid=2778261486](https://img.jgi.doe.gov/cgi-bin/m/main.cgi?section=TaxonDetail&page=taxonDetail&taxon_oid=2778261486)

### 602 **16S rRNA**

603 [https://img.jgi.doe.gov/cgi-](https://img.jgi.doe.gov/cgi-bin/m/main.cgi?section=TaxonDetail&page=rnas&taxon_oid=2778261486&locus_type=rRNA&gene_symbol=16S)  
604 [bin/m/main.cgi?section=TaxonDetail&page=rnas&taxon\\_oid=2778261486&locus\\_type=rRNA&gene](https://img.jgi.doe.gov/cgi-bin/m/main.cgi?section=TaxonDetail&page=rnas&taxon_oid=2778261486&locus_type=rRNA&gene_symbol=16S)  
605 [symbol=16S](https://img.jgi.doe.gov/cgi-bin/m/main.cgi?section=TaxonDetail&page=rnas&taxon_oid=2778261486&locus_type=rRNA&gene_symbol=16S)

606 - Scaffold source:

607 [https://img.jgi.doe.gov/cgi-](https://img.jgi.doe.gov/cgi-bin/m/main.cgi?section=ScaffoldGraph&page=scaffoldGraph&scaffold_oid=2778314286&start_coord=1&end_coord=19214&marker_gene=2780279842&seq_length=19214)  
608 [bin/m/main.cgi?section=ScaffoldGraph&page=scaffoldGraph&scaffold\\_oid=2778314286&start\\_coord=1&end\\_coord=19214&marker\\_gene=2780279842&seq\\_length=19214](https://img.jgi.doe.gov/cgi-bin/m/main.cgi?section=ScaffoldGraph&page=scaffoldGraph&scaffold_oid=2778314286&start_coord=1&end_coord=19214&marker_gene=2780279842&seq_length=19214)

610 - Neighbourhood:

611 [https://img.jgi.doe.gov/cgi-](https://img.jgi.doe.gov/cgi-bin/m/main.cgi?section=GeneDetail&page=geneDetail&gene_oid=2780279842)  
612 [bin/m/main.cgi?section=GeneDetail&page=geneDetail&gene\\_oid=2780279842](https://img.jgi.doe.gov/cgi-bin/m/main.cgi?section=GeneDetail&page=geneDetail&gene_oid=2780279842)

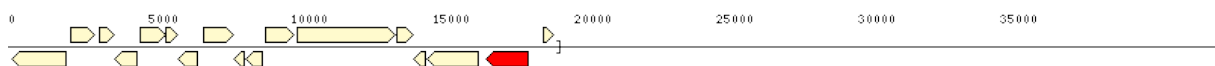

613  
614 14792-16555: glutamyl-tRNA synthetase

615 **16843-18311: 16S rRNA**

616 18861-19214: hypothetical

617

### 618 **23S rRNA**

619 [https://img.jgi.doe.gov/cgi-](https://img.jgi.doe.gov/cgi-bin/m/main.cgi?section=TaxonDetail&page=rnas&taxon_oid=2778261486&locus_type=rRNA&gene_symbol=23S)  
620 [bin/m/main.cgi?section=TaxonDetail&page=rnas&taxon\\_oid=2778261486&locus\\_type=rRNA&gene](https://img.jgi.doe.gov/cgi-bin/m/main.cgi?section=TaxonDetail&page=rnas&taxon_oid=2778261486&locus_type=rRNA&gene_symbol=23S)  
621 [symbol=23S](https://img.jgi.doe.gov/cgi-bin/m/main.cgi?section=TaxonDetail&page=rnas&taxon_oid=2778261486&locus_type=rRNA&gene_symbol=23S)

622 - Scaffold Source:

623 [https://img.jgi.doe.gov/cgi-](https://img.jgi.doe.gov/cgi-bin/m/main.cgi?section=ScaffoldGraph&page=scaffoldGraph&scaffold_oid=2778314283&start_coord=1&end_coord=68485&marker_gene=2780279686&seq_length=68485)  
624 [bin/m/main.cgi?section=ScaffoldGraph&page=scaffoldGraph&scaffold\\_oid=2778314283&start coor](https://img.jgi.doe.gov/cgi-bin/m/main.cgi?section=ScaffoldGraph&page=scaffoldGraph&scaffold_oid=2778314283&start_coord=1&end_coord=68485&marker_gene=2780279686&seq_length=68485)  
625 [d=1&end coord=68485&marker gene=2780279686&seq length=68485](https://img.jgi.doe.gov/cgi-bin/m/main.cgi?section=ScaffoldGraph&page=scaffoldGraph&scaffold_oid=2778314283&start_coord=1&end_coord=68485&marker_gene=2780279686&seq_length=68485)

626 - Neighbourhood:

627 [https://img.jgi.doe.gov/cgi-](https://img.jgi.doe.gov/cgi-bin/m/main.cgi?section=GeneDetail&page=geneDetail&gene_oid=2780279686)  
628 [bin/m/main.cgi?section=GeneDetail&page=geneDetail&gene\\_oid=2780279686](https://img.jgi.doe.gov/cgi-bin/m/main.cgi?section=GeneDetail&page=geneDetail&gene_oid=2780279686)

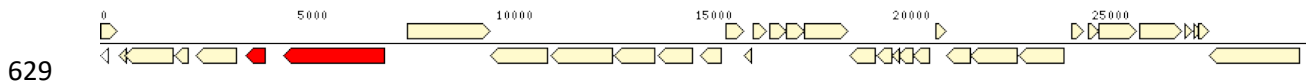

629

630 2417-3454: pyrophosphate-dependent phosphofructokinase

631 **3663 -7182: 23S rRNA** (3663-4177 + 4620-7182)

632 7737 – 9824: ssDNA-binding replication factor A large subunit

633

### 634 **Candidatus Thorarchaeota archaeon AB\_25**

635 Overview:

636 [https://img.jgi.doe.gov/cgi-](https://img.jgi.doe.gov/cgi-bin/m/main.cgi?section=TaxonDetail&page=taxonDetail&taxon_oid=2775506787)  
637 [bin/m/main.cgi?section=TaxonDetail&page=taxonDetail&taxon\\_oid=2775506787](https://img.jgi.doe.gov/cgi-bin/m/main.cgi?section=TaxonDetail&page=taxonDetail&taxon_oid=2775506787)

### 638 **16S rRNA**

639 [https://img.jgi.doe.gov/cgi-](https://img.jgi.doe.gov/cgi-bin/m/main.cgi?section=TaxonDetail&page=rnas&taxon_oid=2775506787&locus_type=rRNA&gene_symbol=16S)  
640 [bin/m/main.cgi?section=TaxonDetail&page=rnas&taxon\\_oid=2775506787&locus\\_type=rRNA&gene](https://img.jgi.doe.gov/cgi-bin/m/main.cgi?section=TaxonDetail&page=rnas&taxon_oid=2775506787&locus_type=rRNA&gene_symbol=16S)  
641 [symbol=16S](https://img.jgi.doe.gov/cgi-bin/m/main.cgi?section=TaxonDetail&page=rnas&taxon_oid=2775506787&locus_type=rRNA&gene_symbol=16S)

642 - Scaffold source:

643 [https://img.jgi.doe.gov/cgi-](https://img.jgi.doe.gov/cgi-bin/m/main.cgi?section=ScaffoldGraph&page=scaffoldGraph&scaffold_oid=2775516521&start_coord=1&end_coord=3575&marker_gene=2775871763&seq_length=3575)  
644 [bin/m/main.cgi?section=ScaffoldGraph&page=scaffoldGraph&scaffold\\_oid=2775516521&start coor](https://img.jgi.doe.gov/cgi-bin/m/main.cgi?section=ScaffoldGraph&page=scaffoldGraph&scaffold_oid=2775516521&start_coord=1&end_coord=3575&marker_gene=2775871763&seq_length=3575)  
645 [d=1&end coord=3575&marker gene=2775871763&seq length=3575](https://img.jgi.doe.gov/cgi-bin/m/main.cgi?section=ScaffoldGraph&page=scaffoldGraph&scaffold_oid=2775516521&start_coord=1&end_coord=3575&marker_gene=2775871763&seq_length=3575)

646 - Neighbourhood:

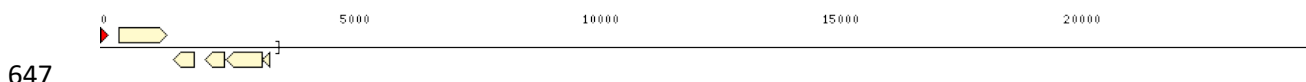

647

648 **1-116 16S rRNA**

649 395-1381: hypothetical

650 1532-1963: hypothetical

651

652 **23S rRNA (no linked 2S9)**



653 [https://img.jgi.doe.gov/cgi-](https://img.jgi.doe.gov/cgi-bin/m/main.cgi?section=TaxonDetail&page=rnas&taxon_oid=2775506787&locus_type=rRNA&gene_symbol=23S)  
654 [bin/m/main.cgi?section=TaxonDetail&page=rnas&taxon\\_oid=2775506787&locus\\_type=rRNA&gene](https://img.jgi.doe.gov/cgi-bin/m/main.cgi?section=TaxonDetail&page=rnas&taxon_oid=2775506787&locus_type=rRNA&gene_symbol=23S)  
655 [symbol=23S](https://img.jgi.doe.gov/cgi-bin/m/main.cgi?section=TaxonDetail&page=rnas&taxon_oid=2775506787&locus_type=rRNA&gene_symbol=23S)

656 - Scaffold source:

657 [https://img.jgi.doe.gov/cgi-](https://img.jgi.doe.gov/cgi-bin/m/main.cgi?section=ScaffoldGraph&page=scaffoldGraph&scaffold_oid=2775516313&start_coord=1&end_coord=26908&marker_gene=2775869598&seq_length=26908)  
658 [bin/m/main.cgi?section=ScaffoldGraph&page=scaffoldGraph&scaffold\\_oid=2775516313&start\\_coord=1&end\\_coord=26908&marker\\_gene=2775869598&seq\\_length=26908](https://img.jgi.doe.gov/cgi-bin/m/main.cgi?section=ScaffoldGraph&page=scaffoldGraph&scaffold_oid=2775516313&start_coord=1&end_coord=26908&marker_gene=2775869598&seq_length=26908)  
659

660

661 - Neighbourhood:

662 [https://img.jgi.doe.gov/cgi-](https://img.jgi.doe.gov/cgi-bin/m/main.cgi?section=GeneDetail&page=geneDetail&gene_oid=2775869598)  
663 [bin/m/main.cgi?section=GeneDetail&page=geneDetail&gene\\_oid=2775869598](https://img.jgi.doe.gov/cgi-bin/m/main.cgi?section=GeneDetail&page=geneDetail&gene_oid=2775869598)

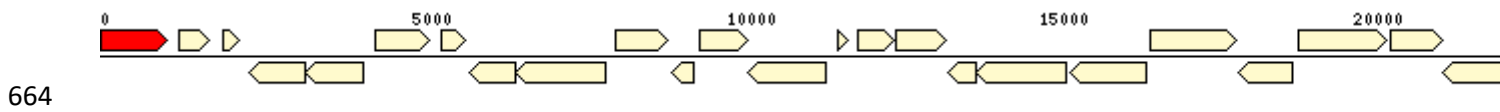

664

665 **1-1060: 23S rRNA**

666 1248-1727: hypothetical

667 1951-2208: hypothetical

668

669 **5S rRNA**

670 [https://img.jgi.doe.gov/cgi-](https://img.jgi.doe.gov/cgi-bin/m/main.cgi?section=TaxonDetail&page=rnas&taxon_oid=2775506787&locus_type=rRNA&gene_symbol=5S)  
671 [bin/m/main.cgi?section=TaxonDetail&page=rnas&taxon\\_oid=2775506787&locus\\_type=rRNA&gene](https://img.jgi.doe.gov/cgi-bin/m/main.cgi?section=TaxonDetail&page=rnas&taxon_oid=2775506787&locus_type=rRNA&gene_symbol=5S)  
672 [symbol=5S](https://img.jgi.doe.gov/cgi-bin/m/main.cgi?section=TaxonDetail&page=rnas&taxon_oid=2775506787&locus_type=rRNA&gene_symbol=5S)

673 - Scaffold source:

674 [https://img.jgi.doe.gov/cgi-](https://img.jgi.doe.gov/cgi-bin/m/main.cgi?section=ScaffoldGraph&page=scaffoldGraph&scaffold_oid=2775516322&start_coord=1&end_coord=22386&marker_gene=2775869808&seq_length=22386)  
675 [bin/m/main.cgi?section=ScaffoldGraph&page=scaffoldGraph&scaffold\\_oid=2775516322&start\\_coord=1&end\\_coord=22386&marker\\_gene=2775869808&seq\\_length=22386](https://img.jgi.doe.gov/cgi-bin/m/main.cgi?section=ScaffoldGraph&page=scaffoldGraph&scaffold_oid=2775516322&start_coord=1&end_coord=22386&marker_gene=2775869808&seq_length=22386)  
676

677

678 - Neighbourhood:

679 [https://img.jgi.doe.gov/cgi-](https://img.jgi.doe.gov/cgi-bin/m/main.cgi?section=GeneDetail&page=geneDetail&gene_oid=2775869808)  
680 [bin/m/main.cgi?section=GeneDetail&page=geneDetail&gene\\_oid=2775869808](https://img.jgi.doe.gov/cgi-bin/m/main.cgi?section=GeneDetail&page=geneDetail&gene_oid=2775869808)

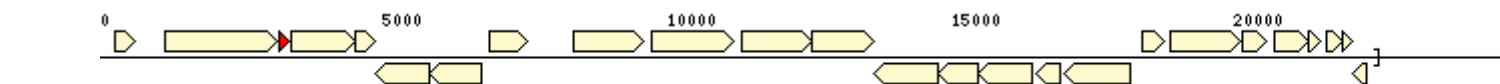

681

682 1152-3134 hypothetical

683 **3161-3279: 5S rRNA**

684 3355-4482: hypothetical

685 4490-4855: hypothetical

686

687 **Candidatus Thorarchaeota archaeon SMTZ1-83**

688 Overview:

689 [https://img.jgi.doe.gov/cgi-](https://img.jgi.doe.gov/cgi-bin/m/main.cgi?section=TaxonDetail&page=taxonDetail&taxon_oid=2740891981)  
690 [bin/m/main.cgi?section=TaxonDetail&page=taxonDetail&taxon\\_oid=2740891981](https://img.jgi.doe.gov/cgi-bin/m/main.cgi?section=TaxonDetail&page=taxonDetail&taxon_oid=2740891981)

691 **16S rRNA**

692 [https://img.jgi.doe.gov/cgi-](https://img.jgi.doe.gov/cgi-bin/m/main.cgi?section=TaxonDetail&page=rnas&taxon_oid=2740891981&locus_type=rRNA&gene_symbol=16S)  
693 [bin/m/main.cgi?section=TaxonDetail&page=rnas&taxon\\_oid=2740891981&locus\\_type=rRNA&gene](https://img.jgi.doe.gov/cgi-bin/m/main.cgi?section=TaxonDetail&page=rnas&taxon_oid=2740891981&locus_type=rRNA&gene_symbol=16S)  
694 [symbol=16S](https://img.jgi.doe.gov/cgi-bin/m/main.cgi?section=TaxonDetail&page=rnas&taxon_oid=2740891981&locus_type=rRNA&gene_symbol=16S)

695

696 **16S rRNA #1** (no linked 23/5S)

697 - Scaffold source:

698 [https://img.jgi.doe.gov/cgi-](https://img.jgi.doe.gov/cgi-bin/m/main.cgi?section=ScaffoldGraph&page=scaffoldGraph&scaffold_oid=2740900874&start_coord=1&end_coord=5948&marker_gene=2741370659&seq_length=5948)  
699 [bin/m/main.cgi?section=ScaffoldGraph&page=scaffoldGraph&scaffold\\_oid=2740900874&start\\_coord=1&end\\_coord=5948&marker\\_gene=2741370659&seq\\_length=5948](https://img.jgi.doe.gov/cgi-bin/m/main.cgi?section=ScaffoldGraph&page=scaffoldGraph&scaffold_oid=2740900874&start_coord=1&end_coord=5948&marker_gene=2741370659&seq_length=5948)

701

702 - Neighbourhood:

703 [https://img.jgi.doe.gov/cgi-](https://img.jgi.doe.gov/cgi-bin/m/main.cgi?section=GeneDetail&page=geneDetail&gene_oid=2741370659)  
704 [bin/m/main.cgi?section=GeneDetail&page=geneDetail&gene\\_oid=2741370659](https://img.jgi.doe.gov/cgi-bin/m/main.cgi?section=GeneDetail&page=geneDetail&gene_oid=2741370659)

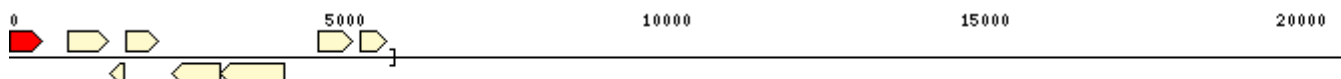

705

706 **1-516: 16S rRNA**

707 945-1565: protein-S-isoprenylcysteine O-methyltransferase

708 1589-1801 hypothetical

709

710 **16S rRNA #2** (inconclusive)

711 - Scaffold source:

712 [https://img.jgi.doe.gov/cgi-](https://img.jgi.doe.gov/cgi-bin/m/main.cgi?section=ScaffoldGraph&page=scaffoldGraph&scaffold_oid=2740901004&start_coord=1&end_coord=12722&marker_gene=2741372168&seq_length=12722)  
713 [bin/m/main.cgi?section=ScaffoldGraph&page=scaffoldGraph&scaffold\\_oid=2740901004&start\\_coord=1&end\\_coord=12722&marker\\_gene=2741372168&seq\\_length=12722](https://img.jgi.doe.gov/cgi-bin/m/main.cgi?section=ScaffoldGraph&page=scaffoldGraph&scaffold_oid=2740901004&start_coord=1&end_coord=12722&marker_gene=2741372168&seq_length=12722)

715

716 - Neighbourhood:

717 [https://img.jgi.doe.gov/cgi-](https://img.jgi.doe.gov/cgi-bin/m/main.cgi?section=GeneDetail&page=geneDetail&gene_oid=2741372168)  
718 [bin/m/main.cgi?section=GeneDetail&page=geneDetail&gene\\_oid=2741372168](https://img.jgi.doe.gov/cgi-bin/m/main.cgi?section=GeneDetail&page=geneDetail&gene_oid=2741372168)

719

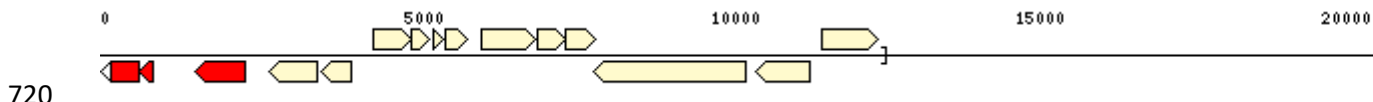

720

721

722 **23S rRNA** (no linked 23S/5S)

723 [https://img.jgi.doe.gov/cgi-](https://img.jgi.doe.gov/cgi-bin/m/main.cgi?section=TaxonDetail&page=rnas&taxon_oid=2740891981&locus_type=rRNA&gene_symbol=23S)

724 [bin/m/main.cgi?section=TaxonDetail&page=rnas&taxon\\_oid=2740891981&locus\\_type=rRNA&gene](https://img.jgi.doe.gov/cgi-bin/m/main.cgi?section=TaxonDetail&page=rnas&taxon_oid=2740891981&locus_type=rRNA&gene_symbol=23S)

725 [symbol=23S](https://img.jgi.doe.gov/cgi-bin/m/main.cgi?section=TaxonDetail&page=rnas&taxon_oid=2740891981&locus_type=rRNA&gene_symbol=23S)

726 - Scaffold source:

727 [https://img.jgi.doe.gov/cgi-](https://img.jgi.doe.gov/cgi-bin/m/main.cgi?section=ScaffoldGraph&page=scaffoldGraph&scaffold_oid=2740900796&start_coord=1&end_coord=24031&marker_gene=2741369673&seq_length=24031)

728 [bin/m/main.cgi?section=ScaffoldGraph&page=scaffoldGraph&scaffold\\_oid=2740900796&start\\_coord=](https://img.jgi.doe.gov/cgi-bin/m/main.cgi?section=ScaffoldGraph&page=scaffoldGraph&scaffold_oid=2740900796&start_coord=1&end_coord=24031&marker_gene=2741369673&seq_length=24031)

729 [1&end\\_coord=24031&marker\\_gene=2741369673&seq\\_length=24031](https://img.jgi.doe.gov/cgi-bin/m/main.cgi?section=ScaffoldGraph&page=scaffoldGraph&scaffold_oid=2740900796&start_coord=1&end_coord=24031&marker_gene=2741369673&seq_length=24031)

730 - Neighbourhood:

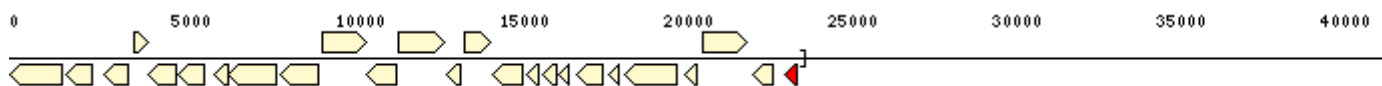

731

732 22651-23277: hypothetical

733 23639-24031: **23S rRNA**

734

735 **Wukongarchaeote WOR431** - LMSG\_G000000612.1

736 Source: <https://www.biosino.org/elmsg/record/MSG071613>

737 Query sequence 16S and 23S rRNA from *Ca. Prometheoarchaeum syntrophicum*

738 Wukong 16S rRNA on contig\_4272291: 3' end of 16S rRNA not included (end of contig) – not

739 conclusive

740 Wukong 23S RNA on contig\_681832: no 16S rRNA detected within the ~ 7kb upstream of 23S rRNA

741 (Contig size 24392 bp)

742

743 **Wukongarchaeote WOR133** - LMSG\_G000000613.1

744 Source: <https://www.biosino.org/elmsg/record/MSG071614>

745 Query sequence: 16S and 23S rRNA from *Ca. Prometheoarchaeum syntrophicum* and

746 Wukongarchaeote WOR431

747 Wukong 16S rRNA on contig: unknown

748 Wukong 23S RNA on contig\_2017418 (18783 bp) no 16S rRNA detected within the >7 kb upstream of

749 23S rRNA

750

751 **Njordarchaeote GB154**

752 Source: <https://www.biosino.org/elmsg/record/MSG071612>

753 Query sequence: 16S and 23S rRNA from *Ca. Prometheoarchaeum syntrophicum* and  
754 Wukongarchaeote WOR431

755 16S rRNA on contig\_2337563

756 23S rRNA on contig\_4560732 (size 51154 bp) (23S located between ~ 24-27 kb), no matching with 16S  
757 in contig\_2337563, 16S rRNA from *Ca. Prometheoarchaeum syntrophicum* and Wukongarchaeote  
758 WOR43

### 759 **Njordarchaeote GB136**

760 Source: <https://www.biosino.org/elmsg/record/MSG071611>

761 16S rRNA unclear

762 23S rRNA on contig\_199659 (size 5396 bp) (only partial sequence found 3' end 23S at the 5' end of the  
763 contig).

### 764 **Sigynarchaeote SQRJ88**

765 Source: <https://www.biosino.org/elmsg/record/MSG071617>

766 23S rRNA contig\_1571010 (size 58759 bp) ... no 16S rRNA detected in 3kb upstream

767 16S rRNA (partial) contig\_558645 (size 29383): unclear 16S but no 23S in contig

768

### 769 **Candidatus Odinarchaeota archaeon LCB\_4**

770 Overview:

771 [https://img.jgi.doe.gov/cgi-](https://img.jgi.doe.gov/cgi-bin/m/main.cgi?section=TaxonDetail&page=taxonDetail&taxon_oid=2740891986)

772 [bin/m/main.cgi?section=TaxonDetail&page=taxonDetail&taxon\\_oid=2740891986](https://img.jgi.doe.gov/cgi-bin/m/main.cgi?section=TaxonDetail&page=taxonDetail&taxon_oid=2740891986)

### 773 **16S rRNA**

774 [https://img.jgi.doe.gov/cgi-](https://img.jgi.doe.gov/cgi-bin/m/main.cgi?section=GeneDetail&page=geneDetail&gene_oid=2741388754)

775 [bin/m/main.cgi?section=GeneDetail&page=geneDetail&gene\\_oid=2741388754](https://img.jgi.doe.gov/cgi-bin/m/main.cgi?section=GeneDetail&page=geneDetail&gene_oid=2741388754)

### 776 **23S rRNA**

777 [https://img.jgi.doe.gov/cgi-](https://img.jgi.doe.gov/cgi-bin/m/main.cgi?section=GeneDetail&page=geneDetail&gene_oid=2741388755)

778 [bin/m/main.cgi?section=GeneDetail&page=geneDetail&gene\\_oid=2741388755](https://img.jgi.doe.gov/cgi-bin/m/main.cgi?section=GeneDetail&page=geneDetail&gene_oid=2741388755)

779

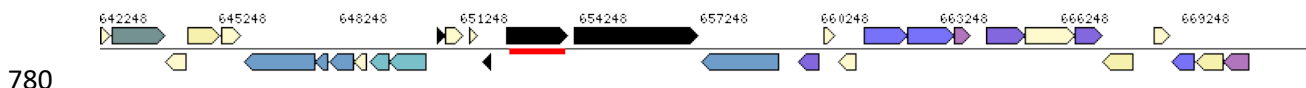

780

781 16S and 23S rRNA are indicated in black

782

783

784 **Nanoarchaeum equitans Kin4-M chromosome, complete genome**

785 Source GenBank: AE017199

786 **16S rRNA**

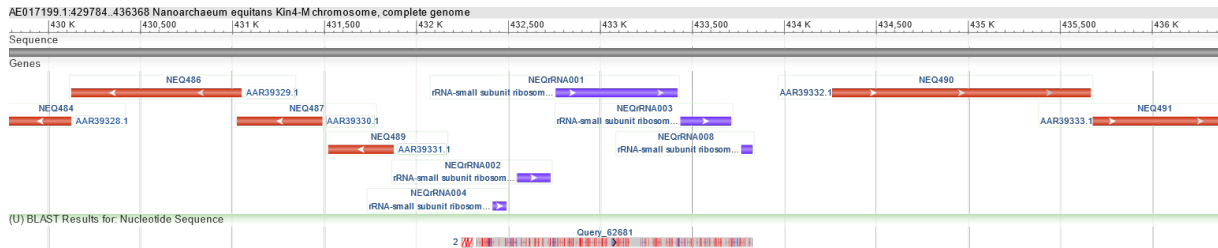

787

788

789 **23S rRNA**

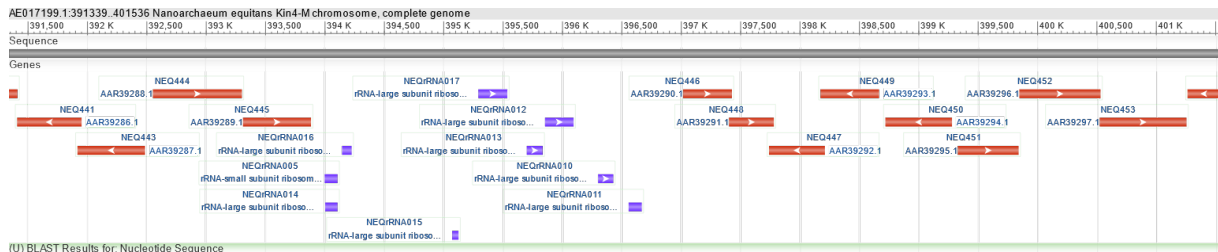

790

791

792 **Candidatus Micrarchaeum sp. strain A\_DKE chromosome, complete genome**

793 NCBI Reference Sequence: NZ\_CP060530.1

794 **16S rRNA**

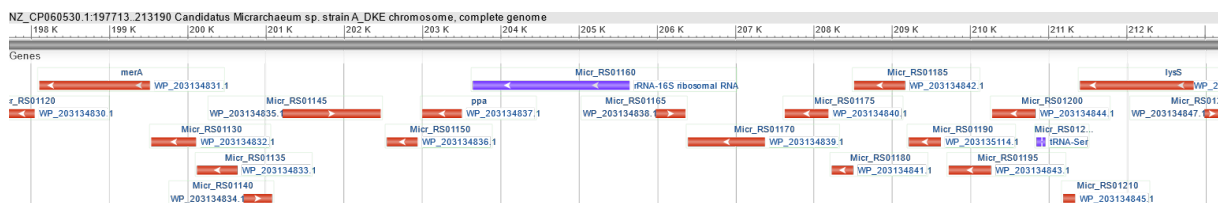

795

796 **23S rRNA**

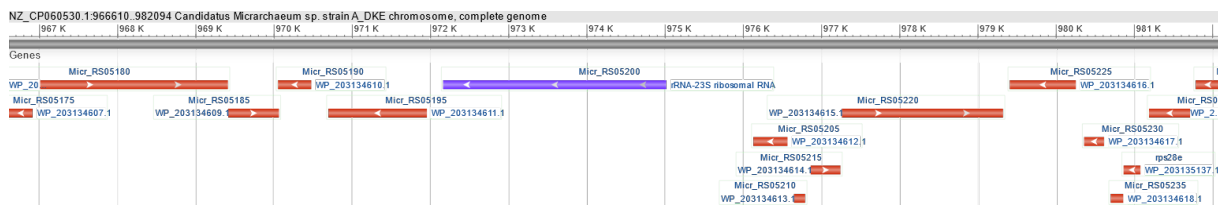

797

798 **Candidatus Nanohalobium constans strain LC1Nh chromosome, complete genome**

799 NCBI Reference Sequence: NZ\_CP040089.1

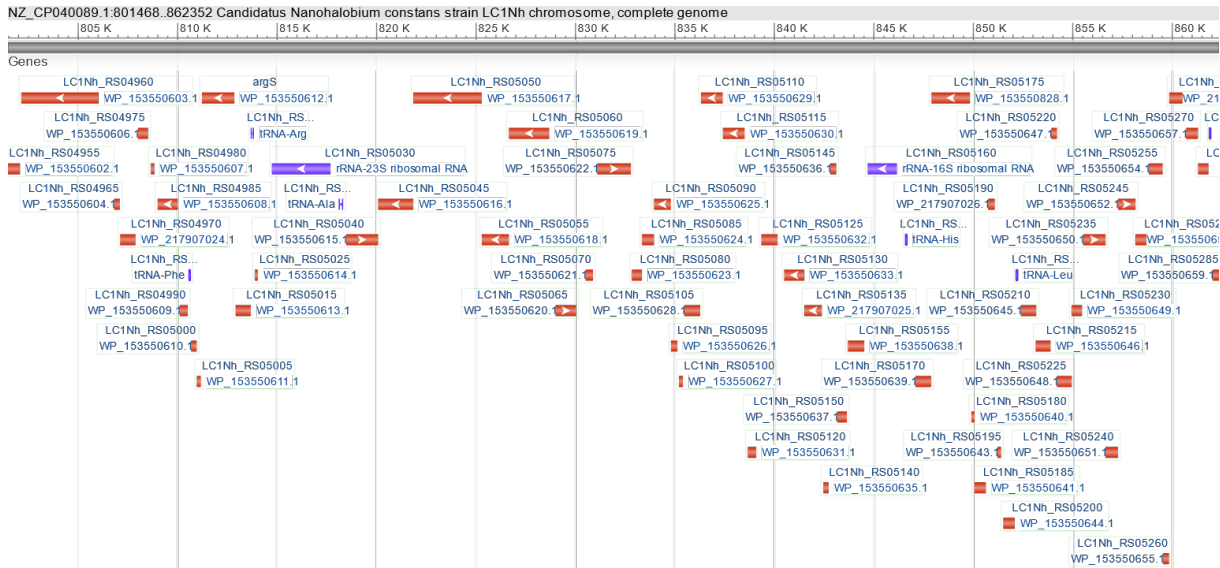

800

801 ***Ferroplasma acidarmanus fer1*, complete genome**

802 GenBank: CP004145.1

803 **16S rRNA**

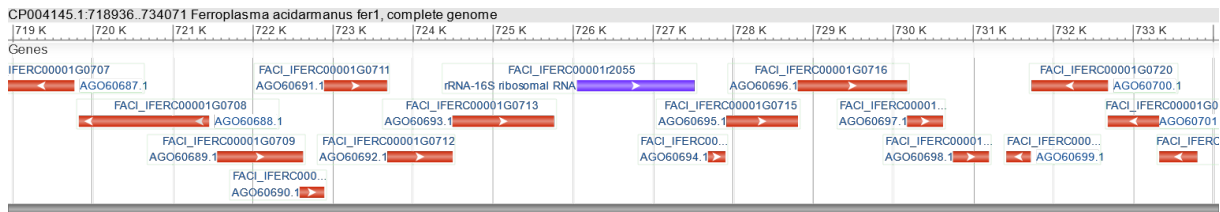

804

805 **23S rRNA**

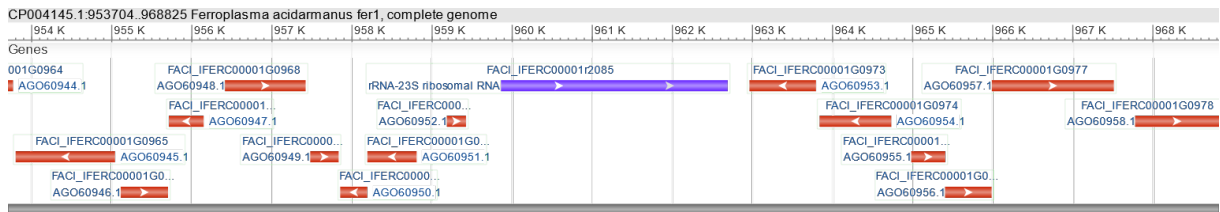

806

807

808

809 ***Ignicoccus hospitalis* KIN4/I, complete genome**

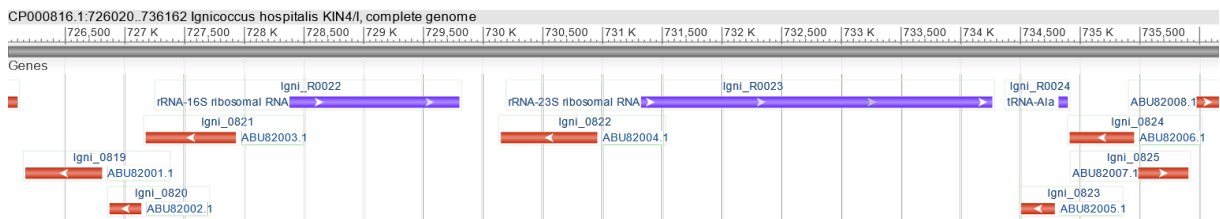

810

811 ***Candidatus Woearchaeota* archaeon isolate NC\_groundwater\_85\_Ag\_S-0.1um\_31\_13 chromosome**

812 GenBank: CP066683.1

813

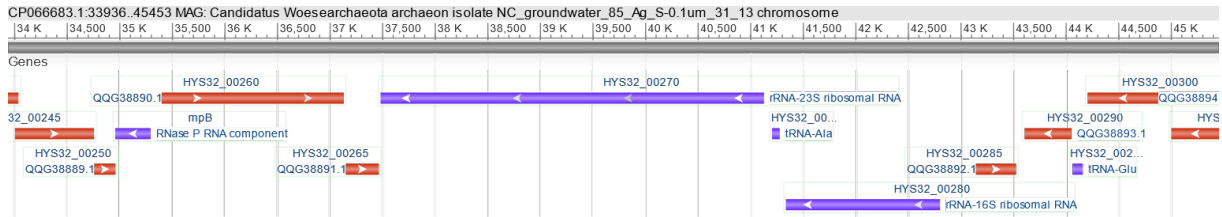

814

815

816 **Woearchaeota archaeon ARS106**

817 [https://img.jgi.doe.gov/cgi-](https://img.jgi.doe.gov/cgi-bin/m/main.cgi?section=TaxonDetail&page=taxonDetail&taxon_oid=2785511140)

818 [bin/m/main.cgi?section=TaxonDetail&page=taxonDetail&taxon\\_oid=2785511140](https://img.jgi.doe.gov/cgi-bin/m/main.cgi?section=TaxonDetail&page=taxonDetail&taxon_oid=2785511140)

819 **16S+23S**

820 [https://img.jgi.doe.gov/cgi-](https://img.jgi.doe.gov/cgi-bin/m/main.cgi?section=ScaffoldGraph&page=scaffoldGraph&scaffold_oid=2785544388&start_coord=1&end_coord=62559&marker_gene=2786194161&seq_length=62559)

821 [bin/m/main.cgi?section=ScaffoldGraph&page=scaffoldGraph&scaffold\\_oid=2785544388&start\\_coord=1&end\\_coord=62559&marker\\_gene=2786194161&seq\\_length=62559](https://img.jgi.doe.gov/cgi-bin/m/main.cgi?section=ScaffoldGraph&page=scaffoldGraph&scaffold_oid=2785544388&start_coord=1&end_coord=62559&marker_gene=2786194161&seq_length=62559)

823

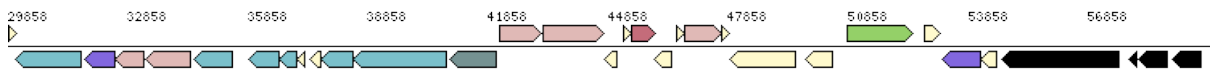

824

825 **23S- tRNA-16S rRNA in black**

826

827 **Candidatus Aenigmarchaeota archaeon isolate NC\_groundwater\_134\_Ag\_S-0.1um\_56\_17 chromosome**

828

829 GenBank: CP066684.1

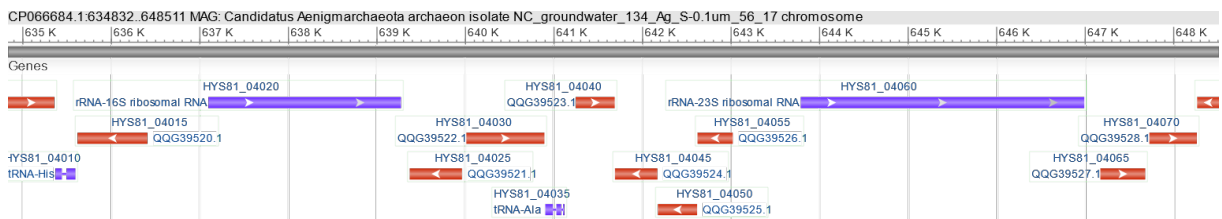

830

831 **Candidatus Aenigmarchaeota archaeon LHA6**

832 [https://img.jgi.doe.gov/cgi-](https://img.jgi.doe.gov/cgi-bin/m/main.cgi?section=TaxonDetail&page=taxonDetail&taxon_oid=2875759356)

833 [bin/m/main.cgi?section=TaxonDetail&page=taxonDetail&taxon\\_oid=2875759356](https://img.jgi.doe.gov/cgi-bin/m/main.cgi?section=TaxonDetail&page=taxonDetail&taxon_oid=2875759356)

834 **16+23S rRNA**

835 [https://img.jgi.doe.gov/cgi-](https://img.jgi.doe.gov/cgi-bin/m/main.cgi?section=ScaffoldGraph&page=scaffoldGraph&scaffold_oid=2875759356&start_coord=1&end_coord=27007&marker_gene=2875759361&seq_length=27007)

836 [bin/m/main.cgi?section=ScaffoldGraph&page=scaffoldGraph&scaffold\\_oid=2875759356&start\\_coord=1&end\\_coord=27007&marker\\_gene=2875759361&seq\\_length=27007](https://img.jgi.doe.gov/cgi-bin/m/main.cgi?section=ScaffoldGraph&page=scaffoldGraph&scaffold_oid=2875759356&start_coord=1&end_coord=27007&marker_gene=2875759361&seq_length=27007)

837

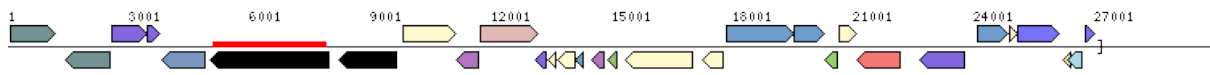

838

839 **in black 23S-16S (no tRNA Ala?)**

840

841 **Candidatus Aenigmarchaeota archaeon LHD6**

842 [https://img.jgi.doe.gov/cgi-](https://img.jgi.doe.gov/cgi-bin/m/main.cgi?section=TaxonDetail&page=taxonDetail&taxon_oid=2875931624)

843 [bin/m/main.cgi?section=TaxonDetail&page=taxonDetail&taxon\\_oid=2875931624](https://img.jgi.doe.gov/cgi-bin/m/main.cgi?section=TaxonDetail&page=taxonDetail&taxon_oid=2875931624)

844 **16+23S rRNA**

845 [https://img.jgi.doe.gov/cgi-](https://img.jgi.doe.gov/cgi-bin/m/main.cgi?section=ScaffoldGraph&page=scaffoldGraph&scaffold_oid=2875931638&start_coord=1&end_coord=9655&marker_gene=2875932010&seq_length=9655)

846 [bin/m/main.cgi?section=ScaffoldGraph&page=scaffoldGraph&scaffold\\_oid=2875931638&start\\_coord=1&end\\_coord=9655&marker\\_gene=2875932010&seq\\_length=9655](https://img.jgi.doe.gov/cgi-bin/m/main.cgi?section=ScaffoldGraph&page=scaffoldGraph&scaffold_oid=2875931638&start_coord=1&end_coord=9655&marker_gene=2875932010&seq_length=9655)

847 [d=1&end\\_coord=9655&marker\\_gene=2875932010&seq\\_length=9655](https://img.jgi.doe.gov/cgi-bin/m/main.cgi?section=ScaffoldGraph&page=scaffoldGraph&scaffold_oid=2875931638&start_coord=1&end_coord=9655&marker_gene=2875932010&seq_length=9655)

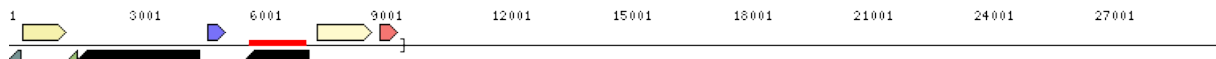

848

849 in black 23S/16S rRNA (no tRNA Ala?)

850 1744-4748: 23S rRNA

851 4934-5380: membrane-associated phospholipid phosphatase

852 5905-7456: 16S rRNA

853

854 **Candidatus Diapherotrites archaeon isolate Fred\_18-Q3-R57-64\_BAT3C.431 chromosome, complete genome**

855 **GenBank: CP064981.1**

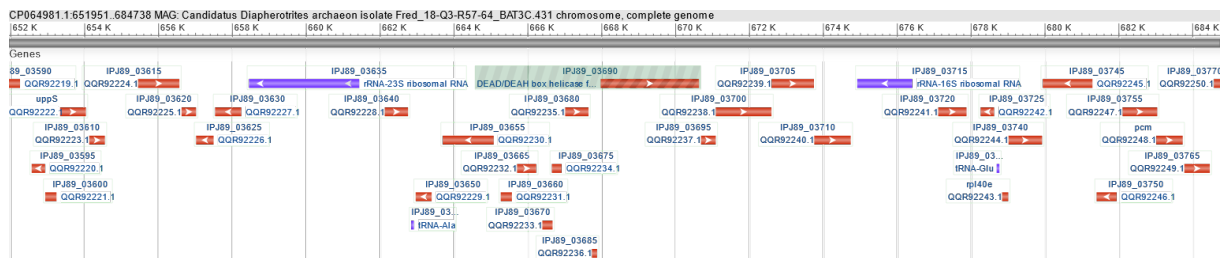

857

858

859 **Candidatus Nanosalinarum sp. J07AB56**

860 **16S rRNA**

861 [https://img.jgi.doe.gov/cgi-](https://img.jgi.doe.gov/cgi-bin/m/main.cgi?section=TaxonDetail&page=rnas&taxon_oid=2502422327&locus_type=rRNA&gene_symbol=16S)

862 [bin/m/main.cgi?section=TaxonDetail&page=rnas&taxon\\_oid=2502422327&locus\\_type=rRNA&gene](https://img.jgi.doe.gov/cgi-bin/m/main.cgi?section=TaxonDetail&page=rnas&taxon_oid=2502422327&locus_type=rRNA&gene_symbol=16S)

863 [symbol=16S](https://img.jgi.doe.gov/cgi-bin/m/main.cgi?section=TaxonDetail&page=rnas&taxon_oid=2502422327&locus_type=rRNA&gene_symbol=16S)

864 - Scaffold source:

865 [https://img.jgi.doe.gov/cgi-](https://img.jgi.doe.gov/cgi-bin/m/main.cgi?section=ScaffoldGraph&page=scaffoldGraph&scaffold_oid=2502426305&start_coord=381094&end_coord=782580&marker_gene=2502522245&seq_length=959093)

866 [bin/m/main.cgi?section=ScaffoldGraph&page=scaffoldGraph&scaffold\\_oid=2502426305&start\\_coord=381094&end\\_coord=782580&marker\\_gene=2502522245&seq\\_length=959093](https://img.jgi.doe.gov/cgi-bin/m/main.cgi?section=ScaffoldGraph&page=scaffoldGraph&scaffold_oid=2502426305&start_coord=381094&end_coord=782580&marker_gene=2502522245&seq_length=959093)

867 [d=381094&end\\_coord=782580&marker\\_gene=2502522245&seq\\_length=959093](https://img.jgi.doe.gov/cgi-bin/m/main.cgi?section=ScaffoldGraph&page=scaffoldGraph&scaffold_oid=2502426305&start_coord=381094&end_coord=782580&marker_gene=2502522245&seq_length=959093)

868 - Neighbourhood:



869 [https://img.jgi.doe.gov/cgi-](https://img.jgi.doe.gov/cgi-bin/m/main.cgi?section=GeneDetail&page=geneDetail&gene_oid=2502522245)  
870 [bin/m/main.cgi?section=GeneDetail&page=geneDetail&gene\\_oid=2502522245](https://img.jgi.doe.gov/cgi-bin/m/main.cgi?section=GeneDetail&page=geneDetail&gene_oid=2502522245)

871 -

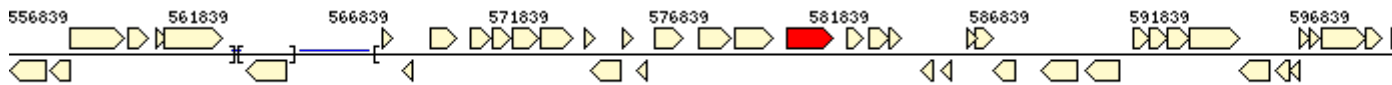

872  
873 579466-580686: Glutamate dehydrogenase/leucine dehydrogenase

874 **581094-582580: 16S rRNA**

875 582980-583507: hypothetical

876 **23S rRNA**

877 [https://img.jgi.doe.gov/cgi-](https://img.jgi.doe.gov/cgi-bin/m/main.cgi?section=TaxonDetail&page=rnas&taxon_oid=2502422327&locus_type=rRNA&gene_symbol=23S)  
878 [bin/m/main.cgi?section=TaxonDetail&page=rnas&taxon\\_oid=2502422327&locus\\_type=rRNA&gene](https://img.jgi.doe.gov/cgi-bin/m/main.cgi?section=TaxonDetail&page=rnas&taxon_oid=2502422327&locus_type=rRNA&gene_symbol=23S)  
879 [symbol=23S](https://img.jgi.doe.gov/cgi-bin/m/main.cgi?section=TaxonDetail&page=rnas&taxon_oid=2502422327&locus_type=rRNA&gene_symbol=23S)

880 - Scaffold source:

881 [https://img.jgi.doe.gov/cgi-](https://img.jgi.doe.gov/cgi-bin/m/main.cgi?section=ScaffoldGraph&page=scaffoldGraph&scaffold_oid=2502426304&start_coord=1&end_coord=60285&marker_gene=2502521495&seq_length=60285)  
882 [bin/m/main.cgi?section=ScaffoldGraph&page=scaffoldGraph&scaffold\\_oid=2502426304&start\\_coord=1&end\\_coord=60285&marker\\_gene=2502521495&seq\\_length=60285](https://img.jgi.doe.gov/cgi-bin/m/main.cgi?section=ScaffoldGraph&page=scaffoldGraph&scaffold_oid=2502426304&start_coord=1&end_coord=60285&marker_gene=2502521495&seq_length=60285)

884 - Neighbourhood:

885 [https://img.jgi.doe.gov/cgi-](https://img.jgi.doe.gov/cgi-bin/m/main.cgi?section=GeneDetail&page=geneDetail&gene_oid=2502521495)  
886 [bin/m/main.cgi?section=GeneDetail&page=geneDetail&gene\\_oid=2502521495](https://img.jgi.doe.gov/cgi-bin/m/main.cgi?section=GeneDetail&page=geneDetail&gene_oid=2502521495)

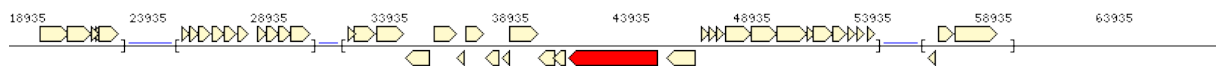

887  
888 41497-41961: cytidine deaminase

889 **42089-45778: 23S rRNA**

890 46139-47326: Cytochrome c biogenesis protein

891

892 **Candidatus Altiarchaeales archaeon WOR\_SM1\_86-2**

893 Overview:

894 [https://img.jgi.doe.gov/cgi-](https://img.jgi.doe.gov/cgi-bin/m/main.cgi?section=TaxonDetail&page=taxonDetail&taxon_oid=2740891980)  
895 [bin/m/main.cgi?section=TaxonDetail&page=taxonDetail&taxon\\_oid=2740891980](https://img.jgi.doe.gov/cgi-bin/m/main.cgi?section=TaxonDetail&page=taxonDetail&taxon_oid=2740891980)

896 16S rRNA

897 [https://img.jgi.doe.gov/cgi-](https://img.jgi.doe.gov/cgi-bin/m/main.cgi?section=TaxonDetail&page=rnas&taxon_oid=2740891980&locus_type=rRNA&gene_symbol=16S)  
898 [bin/m/main.cgi?section=TaxonDetail&page=rnas&taxon\\_oid=2740891980&locus\\_type=rRNA&gene](https://img.jgi.doe.gov/cgi-bin/m/main.cgi?section=TaxonDetail&page=rnas&taxon_oid=2740891980&locus_type=rRNA&gene_symbol=16S)  
899 [symbol=16S](https://img.jgi.doe.gov/cgi-bin/m/main.cgi?section=TaxonDetail&page=rnas&taxon_oid=2740891980&locus_type=rRNA&gene_symbol=16S)

900 - Scaffold source:

901 [https://img.jgi.doe.gov/cgi-](https://img.jgi.doe.gov/cgi-bin/m/main.cgi?section=ScaffoldGraph&page=scaffoldGraph&scaffold_oid=2740900703&start_coord=1&end_coord=30582&marker_gene=2741368404&seq_length=30582)  
902 [bin/m/main.cgi?section=ScaffoldGraph&page=scaffoldGraph&scaffold\\_oid=2740900703&start\\_coord=1&end\\_coord=30582&marker\\_gene=2741368404&seq\\_length=30582](https://img.jgi.doe.gov/cgi-bin/m/main.cgi?section=ScaffoldGraph&page=scaffoldGraph&scaffold_oid=2740900703&start_coord=1&end_coord=30582&marker_gene=2741368404&seq_length=30582)  
903

904 - Neighbourhood:

905 [https://img.jgi.doe.gov/cgi-](https://img.jgi.doe.gov/cgi-bin/m/main.cgi?section=GeneDetail&page=geneDetail&gene_oid=2741368404)  
906 [bin/m/main.cgi?section=GeneDetail&page=geneDetail&gene\\_oid=2741368404](https://img.jgi.doe.gov/cgi-bin/m/main.cgi?section=GeneDetail&page=geneDetail&gene_oid=2741368404)

907

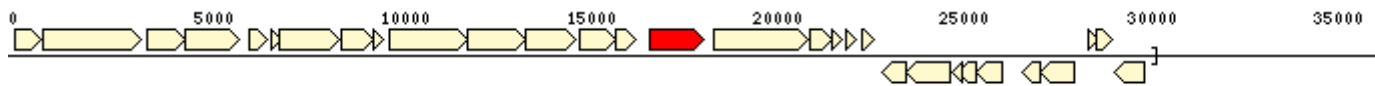

908

909 16274-16828: arginine decarboxylase

910 **14193-18661: 16S rRNA**

911 18927-21428: hypothetical

912

913 **23S rRNA**

914 [https://img.jgi.doe.gov/cgi-](https://img.jgi.doe.gov/cgi-bin/m/main.cgi?section=TaxonDetail&page=rnas&taxon_oid=2740891980&locus_type=rRNA&gene_symbol=23S)  
915 [bin/m/main.cgi?section=TaxonDetail&page=rnas&taxon\\_oid=2740891980&locus\\_type=rRNA&gene](https://img.jgi.doe.gov/cgi-bin/m/main.cgi?section=TaxonDetail&page=rnas&taxon_oid=2740891980&locus_type=rRNA&gene_symbol=23S)  
916 [symbol=23S](https://img.jgi.doe.gov/cgi-bin/m/main.cgi?section=TaxonDetail&page=rnas&taxon_oid=2740891980&locus_type=rRNA&gene_symbol=23S)

917 - Scaffold source:

918 [https://img.jgi.doe.gov/cgi-](https://img.jgi.doe.gov/cgi-bin/m/main.cgi?section=ScaffoldGraph&page=scaffoldGraph&scaffold_oid=2740900624&start_coord=1&end_coord=20366&marker_gene=2741367329&seq_length=20366)  
919 [bin/m/main.cgi?section=ScaffoldGraph&page=scaffoldGraph&scaffold\\_oid=2740900624&start\\_coord=1&end\\_coord=20366&marker\\_gene=2741367329&seq\\_length=20366](https://img.jgi.doe.gov/cgi-bin/m/main.cgi?section=ScaffoldGraph&page=scaffoldGraph&scaffold_oid=2740900624&start_coord=1&end_coord=20366&marker_gene=2741367329&seq_length=20366)  
920

921 - Neighbourhood:

922 [https://img.jgi.doe.gov/cgi-](https://img.jgi.doe.gov/cgi-bin/m/main.cgi?section=GeneDetail&page=geneDetail&gene_oid=2741367329)  
923 [bin/m/main.cgi?section=GeneDetail&page=geneDetail&gene\\_oid=2741367329](https://img.jgi.doe.gov/cgi-bin/m/main.cgi?section=GeneDetail&page=geneDetail&gene_oid=2741367329)

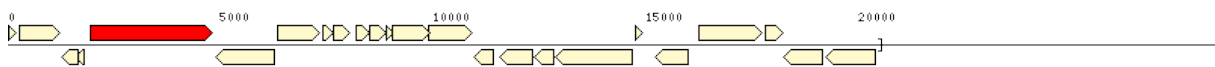

924

925 1243-1784: thymidylate kinase

926 **1928-4816: 23S rRNA**

927 4869-6269: RecJ-like exonuclease

928

929 **Candidate division Huberarchaea archaeon CG\_4\_9\_14\_0\_8\_um\_filter\_31\_21**

930 [https://img.jgi.doe.gov/cgi-](https://img.jgi.doe.gov/cgi-bin/m/main.cgi?section=TaxonDetail&page=taxonDetail&taxon_oid=2785510816)  
931 [bin/m/main.cgi?section=TaxonDetail&page=taxonDetail&taxon\\_oid=2785510816](https://img.jgi.doe.gov/cgi-bin/m/main.cgi?section=TaxonDetail&page=taxonDetail&taxon_oid=2785510816)

932 **16S rRNA**

933 [https://img.jgi.doe.gov/cgi-](https://img.jgi.doe.gov/cgi-bin/m/main.cgi?section=TaxonDetail&page=rnas&taxon_oid=2785510816&locus_type=rRNA&gene_symbol=16S)  
934 [bin/m/main.cgi?section=TaxonDetail&page=rnas&taxon\\_oid=2785510816&locus\\_type=rRNA&gene](https://img.jgi.doe.gov/cgi-bin/m/main.cgi?section=TaxonDetail&page=rnas&taxon_oid=2785510816&locus_type=rRNA&gene_symbol=16S)  
935 [symbol=16S](https://img.jgi.doe.gov/cgi-bin/m/main.cgi?section=TaxonDetail&page=rnas&taxon_oid=2785510816&locus_type=rRNA&gene_symbol=16S)

936 - Scaffold source:

937 [https://img.jgi.doe.gov/cgi-](https://img.jgi.doe.gov/cgi-bin/m/main.cgi?section=ScaffoldGraph&page=scaffoldGraph&scaffold_oid=2785515709&start_coord=1&end_coord=12278&marker_gene=2785880803&seq_length=12278)  
938 [bin/m/main.cgi?section=ScaffoldGraph&page=scaffoldGraph&scaffold\\_oid=2785515709&start coor](https://img.jgi.doe.gov/cgi-bin/m/main.cgi?section=ScaffoldGraph&page=scaffoldGraph&scaffold_oid=2785515709&start_coord=1&end_coord=12278&marker_gene=2785880803&seq_length=12278)  
939 [d=1&end coord=12278&marker gene=2785880803&seq length=12278](https://img.jgi.doe.gov/cgi-bin/m/main.cgi?section=ScaffoldGraph&page=scaffoldGraph&scaffold_oid=2785515709&start_coord=1&end_coord=12278&marker_gene=2785880803&seq_length=12278)

940 - Neighbourhood:

941 [https://img.jgi.doe.gov/cgi-](https://img.jgi.doe.gov/cgi-bin/m/main.cgi?section=GeneDetail&page=geneDetail&gene_oid=2785880803)  
942 [bin/m/main.cgi?section=GeneDetail&page=geneDetail&gene\\_oid=2785880803](https://img.jgi.doe.gov/cgi-bin/m/main.cgi?section=GeneDetail&page=geneDetail&gene_oid=2785880803)

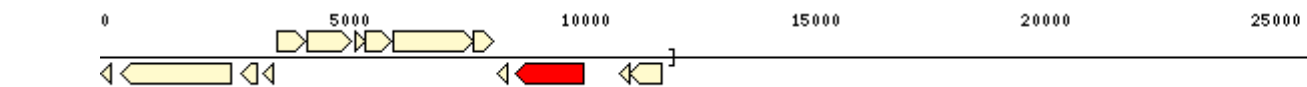

943

944

945 **Candidatus Pacearchaeota archaeon CG10 (Unlinked? – ambiguous) Unusual long spacers**

946 [https://img.jgi.doe.gov/cgi-](https://img.jgi.doe.gov/cgi-bin/m/main.cgi?section=TaxonDetail&page=taxonDetail&taxon_oid=2785510784)  
947 [bin/m/main.cgi?section=TaxonDetail&page=taxonDetail&taxon\\_oid=2785510784](https://img.jgi.doe.gov/cgi-bin/m/main.cgi?section=TaxonDetail&page=taxonDetail&taxon_oid=2785510784)

948 - Scaffold source:

949 [https://img.jgi.doe.gov/cgi-](https://img.jgi.doe.gov/cgi-bin/m/main.cgi?section=ScaffoldGraph&page=scaffoldGraph&scaffold_oid=2785514001&start_coord=1&end_coord=189970&marker_gene=2785853019&seq_length=189970)  
950 [bin/m/main.cgi?section=ScaffoldGraph&page=scaffoldGraph&scaffold\\_oid=2785514001&start coor](https://img.jgi.doe.gov/cgi-bin/m/main.cgi?section=ScaffoldGraph&page=scaffoldGraph&scaffold_oid=2785514001&start_coord=1&end_coord=189970&marker_gene=2785853019&seq_length=189970)  
951 [d=1&end coord=189970&marker gene=2785853019&seq length=189970](https://img.jgi.doe.gov/cgi-bin/m/main.cgi?section=ScaffoldGraph&page=scaffoldGraph&scaffold_oid=2785514001&start_coord=1&end_coord=189970&marker_gene=2785853019&seq_length=189970)

952 - Neighbourhood:

953 **23S rRNA** [https://img.jgi.doe.gov/cgi-](https://img.jgi.doe.gov/cgi-bin/m/main.cgi?section=GeneDetail&page=geneDetail&gene_oid=2785853019)  
954 [bin/m/main.cgi?section=GeneDetail&page=geneDetail&gene\\_oid=2785853019](https://img.jgi.doe.gov/cgi-bin/m/main.cgi?section=GeneDetail&page=geneDetail&gene_oid=2785853019)

955

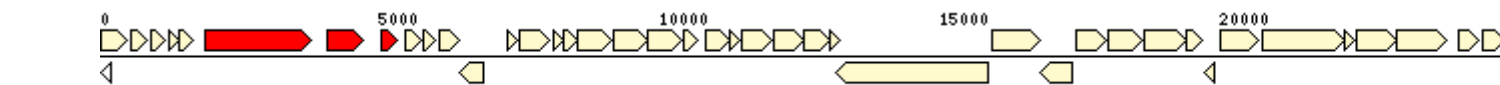

956

957 **16S rRNA** [https://img.jgi.doe.gov/cgi-](https://img.jgi.doe.gov/cgi-bin/m/main.cgi?section=GeneDetail&page=geneDetail&gene_oid=2785853014)  
958 [bin/m/main.cgi?section=GeneDetail&page=geneDetail&gene\\_oid=2785853014](https://img.jgi.doe.gov/cgi-bin/m/main.cgi?section=GeneDetail&page=geneDetail&gene_oid=2785853014)

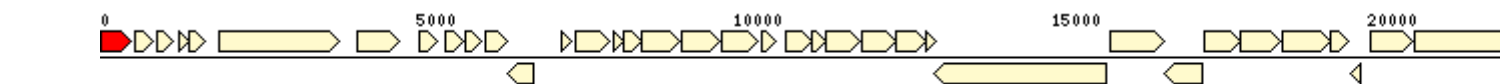

959

960 **Annotation error/Unusual long spacers with small hypothetical ORF (see Pacearchaeota archaeon**  
961 **SCGC AG-274-K21)**

962

963 **1-494: 16S rRNA**

964 **560-850: hypothetical**

965 **895-1164: hypothetical**

966 **1242-1312: tRNA Ala**

967 1405-1656: hypothetical  
968 1876-5304: 23S rRNA  
969 5545-5720: hypothetical

970

971 **Pacearchaeota archaeon SCGC AG-274-K21**

972 [https://img.jgi.doe.gov/cgi-](https://img.jgi.doe.gov/cgi-bin/m/main.cgi?section=TaxonDetail&page=taxonDetail&taxon_oid=2716884242)  
973 [bin/m/main.cgi?section=TaxonDetail&page=taxonDetail&taxon\\_oid=2716884242](https://img.jgi.doe.gov/cgi-bin/m/main.cgi?section=TaxonDetail&page=taxonDetail&taxon_oid=2716884242)

974

975 **16S and 23S rRNA**

976 [https://img.jgi.doe.gov/cgi-](https://img.jgi.doe.gov/cgi-bin/m/main.cgi?section=TaxonDetail&page=rnas&taxon_oid=2716884242&locus_type=rRNA)  
977 [bin/m/main.cgi?section=TaxonDetail&page=rnas&taxon\\_oid=2716884242&locus\\_type=rRNA](https://img.jgi.doe.gov/cgi-bin/m/main.cgi?section=TaxonDetail&page=rnas&taxon_oid=2716884242&locus_type=rRNA)

978 [https://img.jgi.doe.gov/cgi-](https://img.jgi.doe.gov/cgi-bin/m/main.cgi?section=ScaffoldGraph&page=scaffoldGraph&scaffold_oid=2716894039&start_coord=1&end_coord=29909&marker_gene=2717095016&seq_length=29909)  
979 [bin/m/main.cgi?section=ScaffoldGraph&page=scaffoldGraph&scaffold\\_oid=2716894039&start\\_coord=1&end\\_coord=29909&marker\\_gene=2717095016&seq\\_length=29909](https://img.jgi.doe.gov/cgi-bin/m/main.cgi?section=ScaffoldGraph&page=scaffoldGraph&scaffold_oid=2716894039&start_coord=1&end_coord=29909&marker_gene=2717095016&seq_length=29909)

981

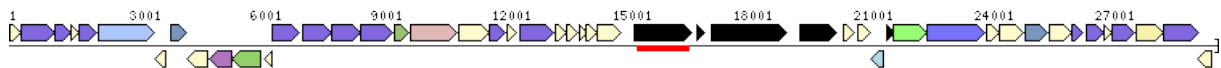

982

983 in black 16S – tRNA Ala – 23S rRNA

984 Similar organisation in Pacearchaeota archaeon NP1466 (probably including annotation error  
985 overlapping with tRNA Ala).

986 [https://img.jgi.doe.gov/cgi-](https://img.jgi.doe.gov/cgi-bin/m/main.cgi?section=TaxonDetail&page=taxonDetail&taxon_oid=2811995088)  
987 [bin/m/main.cgi?section=TaxonDetail&page=taxonDetail&taxon\\_oid=2811995088](https://img.jgi.doe.gov/cgi-bin/m/main.cgi?section=TaxonDetail&page=taxonDetail&taxon_oid=2811995088)

988

989 **Aigarchaeota archaeon SCGC AAA471-J07**

990 [https://img.jgi.doe.gov/cgi-](https://img.jgi.doe.gov/cgi-bin/m/main.cgi?section=TaxonDetail&page=taxonDetail&taxon_oid=2264867226)  
991 [bin/m/main.cgi?section=TaxonDetail&page=taxonDetail&taxon\\_oid=2264867226](https://img.jgi.doe.gov/cgi-bin/m/main.cgi?section=TaxonDetail&page=taxonDetail&taxon_oid=2264867226)

992

993 **16S rRNA**

994 - Scaffold source:

995 [https://img.jgi.doe.gov/cgi-](https://img.jgi.doe.gov/cgi-bin/m/main.cgi?section=ScaffoldGraph&page=scaffoldGraph&scaffold_oid=2264886741&start_coord=1&end_coord=33878&marker_gene=2265091874&seq_length=33878)  
996 [bin/m/main.cgi?section=ScaffoldGraph&page=scaffoldGraph&scaffold\\_oid=2264886741&start\\_coord=1&end\\_coord=33878&marker\\_gene=2265091874&seq\\_length=33878](https://img.jgi.doe.gov/cgi-bin/m/main.cgi?section=ScaffoldGraph&page=scaffoldGraph&scaffold_oid=2264886741&start_coord=1&end_coord=33878&marker_gene=2265091874&seq_length=33878)

998 - Neighbourhood:

999 [https://img.jgi.doe.gov/cgi-](https://img.jgi.doe.gov/cgi-bin/m/main.cgi?section=GeneDetail&page=geneDetail&gene_oid=2265091874)  
1000 [bin/m/main.cgi?section=GeneDetail&page=geneDetail&gene\\_oid=2265091874](https://img.jgi.doe.gov/cgi-bin/m/main.cgi?section=GeneDetail&page=geneDetail&gene_oid=2265091874)

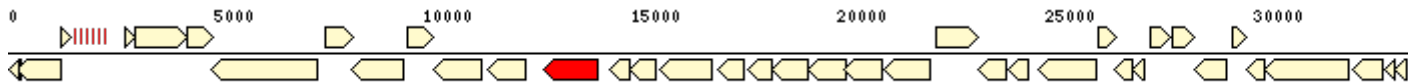

1001

1002 11546-15445: hypothetical

1003 12899-14221: 16S rRNA

1004 14468-14947: NADH-quinone oxidoreductase subunit C

1005

1006 **Candidatus Caldiarchaeum subterraneum DNA, complete genome,**

1007 GenBank: BA000048.1

1008 **16S rRNA**

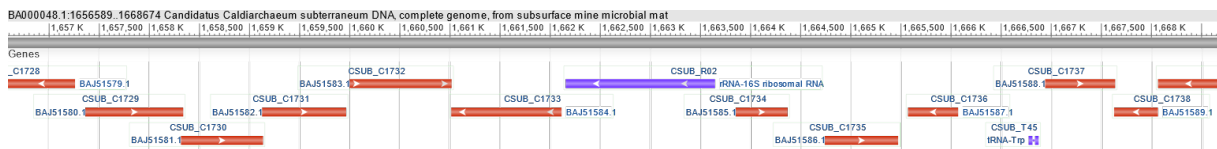

1009

1010 **23S rRNA**

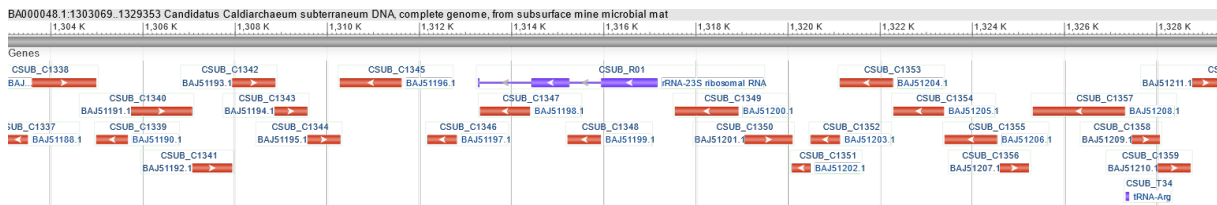

1011

1012

1013 **Candidatus Nitrososphaera gargensis Ga9-2**

1014 [https://img.jgi.doe.gov/cgi-](https://img.jgi.doe.gov/cgi-bin/m/main.cgi?section=TaxonDetail&page=taxonDetail&taxon_oid=2510065023)

1015 [bin/m/main.cgi?section=TaxonDetail&page=taxonDetail&taxon\\_oid=2510065023](https://img.jgi.doe.gov/cgi-bin/m/main.cgi?section=TaxonDetail&page=taxonDetail&taxon_oid=2510065023)

1016 **16S+23S rRNA**

1017 [https://img.jgi.doe.gov/cgi-](https://img.jgi.doe.gov/cgi-bin/m/main.cgi?section=ScaffoldGraph&page=scaffoldGraph&scaffold_oid=2510066862&start_coord=757278&end_coord=1210240&marker_gene=2510153226&seq_length=2833736)

1018 [bin/m/main.cgi?section=ScaffoldGraph&page=scaffoldGraph&scaffold\\_oid=2510066862&start\\_coord=757278&end\\_coord=1210240&marker\\_gene=2510153226&seq\\_length=2833736](https://img.jgi.doe.gov/cgi-bin/m/main.cgi?section=ScaffoldGraph&page=scaffoldGraph&scaffold_oid=2510066862&start_coord=757278&end_coord=1210240&marker_gene=2510153226&seq_length=2833736)

1019

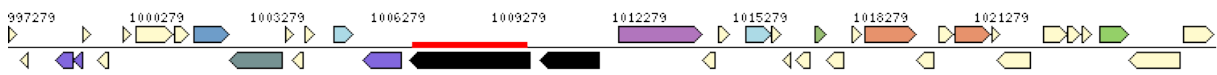

1020

1021 **in black 23S-16S rRNA**

1022

1023 **Nitrososphaera viennensis EN76, complete genome (unlinked? very small ORF annotated in**  
 1024 **between -annotation issue?!)**

1025 GenBank: CP007536.1

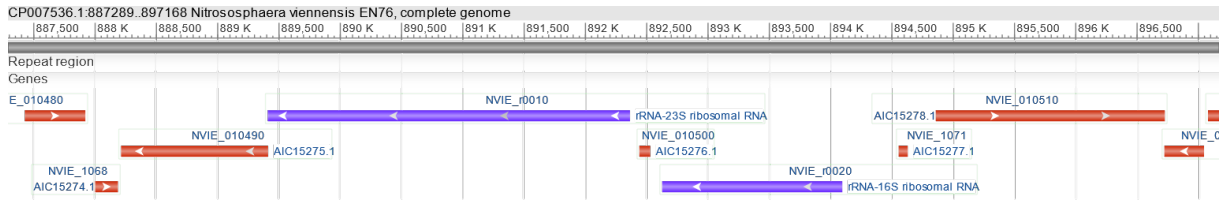

1026

1027

1028 **Nitrosopumilus sp. Nsub**

1029 [https://img.jgi.doe.gov/cgi-](https://img.jgi.doe.gov/cgi-bin/m/main.cgi?section=TaxonDetail&page=taxonDetail&taxon_oid=2690315682)

1030 [bin/m/main.cgi?section=TaxonDetail&page=taxonDetail&taxon\\_oid=2690315682](https://img.jgi.doe.gov/cgi-bin/m/main.cgi?section=TaxonDetail&page=taxonDetail&taxon_oid=2690315682)

1031 - Scaffold source:

1032 [https://img.jgi.doe.gov/cgi-](https://img.jgi.doe.gov/cgi-bin/m/main.cgi?section=ScaffoldGraph&page=scaffoldGraph&scaffold_oid=2690318230&start_coord=1&end_coord=52337&marker_gene=2690705878&seq_length=52337)

1033 [bin/m/main.cgi?section=ScaffoldGraph&page=scaffoldGraph&scaffold\\_oid=2690318230&start\\_coord=1&end\\_coord=52337&marker\\_gene=2690705878&seq\\_length=52337](https://img.jgi.doe.gov/cgi-bin/m/main.cgi?section=ScaffoldGraph&page=scaffoldGraph&scaffold_oid=2690318230&start_coord=1&end_coord=52337&marker_gene=2690705878&seq_length=52337)

1034 [d=1&end\\_coord=52337&marker\\_gene=2690705878&seq\\_length=52337](https://img.jgi.doe.gov/cgi-bin/m/main.cgi?section=ScaffoldGraph&page=scaffoldGraph&scaffold_oid=2690318230&start_coord=1&end_coord=52337&marker_gene=2690705878&seq_length=52337)

1035 **16S +23S**

1036 [https://img.jgi.doe.gov/cgi-](https://img.jgi.doe.gov/cgi-bin/m/main.cgi?section=ScaffoldGraph&page=scaffoldGraph&scaffold_oid=2690318230&start_coord=1&end_coord=52337&marker_gene=2690705878&seq_length=52337)

1037 [bin/m/main.cgi?section=ScaffoldGraph&page=scaffoldGraph&scaffold\\_oid=2690318230&start\\_coord=1&end\\_coord=52337&marker\\_gene=2690705878&seq\\_length=52337](https://img.jgi.doe.gov/cgi-bin/m/main.cgi?section=ScaffoldGraph&page=scaffoldGraph&scaffold_oid=2690318230&start_coord=1&end_coord=52337&marker_gene=2690705878&seq_length=52337)

1038 [d=1&end\\_coord=52337&marker\\_gene=2690705878&seq\\_length=52337](https://img.jgi.doe.gov/cgi-bin/m/main.cgi?section=ScaffoldGraph&page=scaffoldGraph&scaffold_oid=2690318230&start_coord=1&end_coord=52337&marker_gene=2690705878&seq_length=52337)

1039

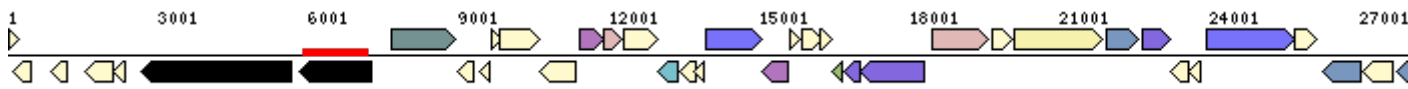

1040

1041 **23S and 16S rRNA in black**

1042

1043 ***Haloferax volcanii* DS2, complete sequence**

1044 GenBank: CP001956.1

1045 **rDNA#1**

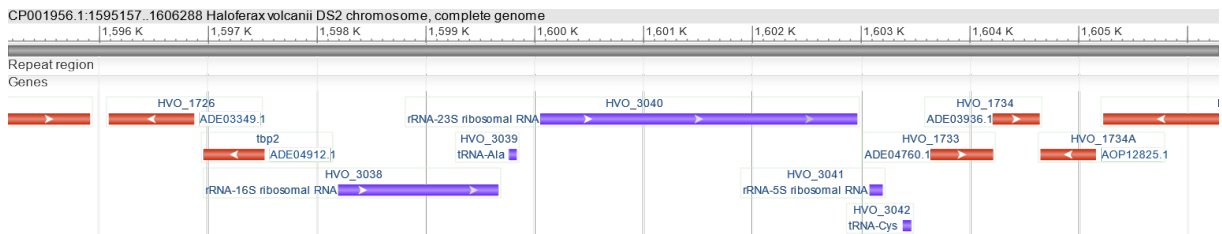

1046

1047

1048 **rDNA#2**

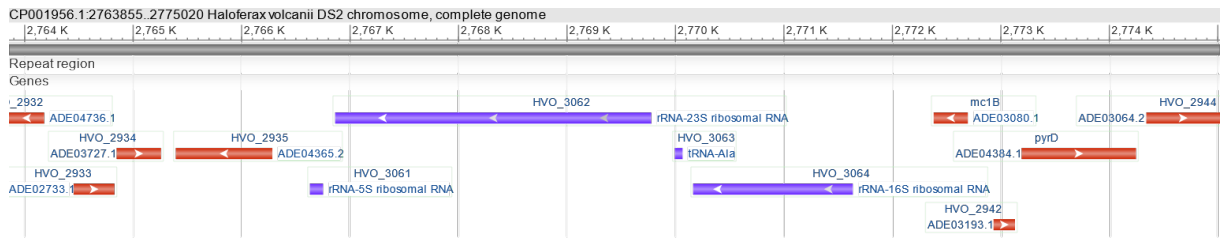

1049

1050 ***Sulfolobus acidocaldarius* strain NG05B\_CO5\_07 genome**

1051 GenBank: CP013695.1

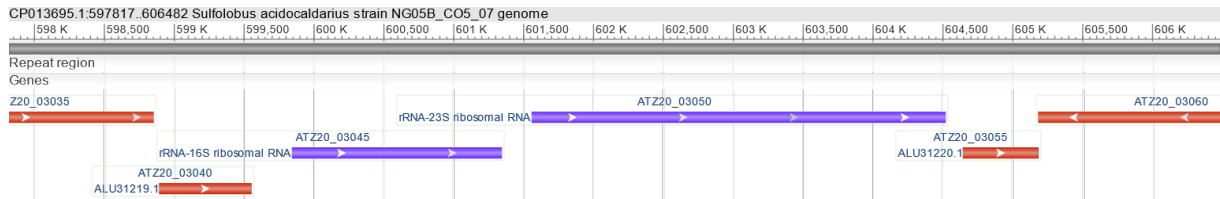

1052

1053 **Candidatus Korarchaeum cryptofilum OPF8, complete genome**

1054 GenBank: CP000968.1

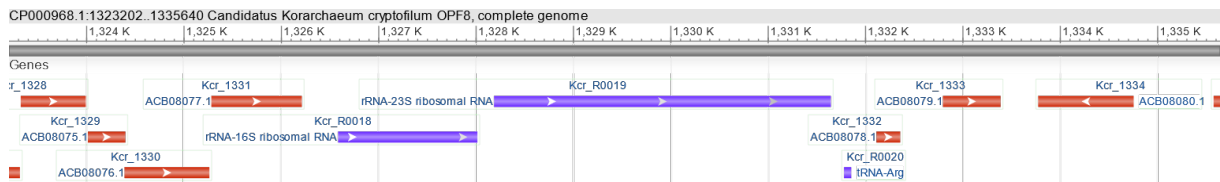

1055

1056

1057

1058 ***Methanonatronarchaeum thermophilum* AMET1**

1059 [https://img.jgi.doe.gov/cgi-](https://img.jgi.doe.gov/cgi-bin/m/main.cgi?section=TaxonDetail&page=taxonDetail&taxon_oid=2786546529)  
 1060 [bin/m/main.cgi?section=TaxonDetail&page=taxonDetail&taxon\\_oid=2786546529](https://img.jgi.doe.gov/cgi-bin/m/main.cgi?section=TaxonDetail&page=taxonDetail&taxon_oid=2786546529)

1061 **16+23S rRNA**

1062 [https://img.jgi.doe.gov/cgi-](https://img.jgi.doe.gov/cgi-bin/m/main.cgi?section=ScaffoldGraph&page=scaffoldGraph&scaffold_oid=2786603347&start_coord=1&end_coord=224098&marker_gene=2787456131&seq_length=483384)  
 1063 [bin/m/main.cgi?section=ScaffoldGraph&page=scaffoldGraph&scaffold\\_oid=2786603347&start\\_coord=](https://img.jgi.doe.gov/cgi-bin/m/main.cgi?section=ScaffoldGraph&page=scaffoldGraph&scaffold_oid=2786603347&start_coord=1&end_coord=224098&marker_gene=2787456131&seq_length=483384)  
 1064 [d=1&end\\_coord=224098&marker\\_gene=2787456131&seq\\_length=483384](https://img.jgi.doe.gov/cgi-bin/m/main.cgi?section=ScaffoldGraph&page=scaffoldGraph&scaffold_oid=2786603347&start_coord=1&end_coord=224098&marker_gene=2787456131&seq_length=483384)

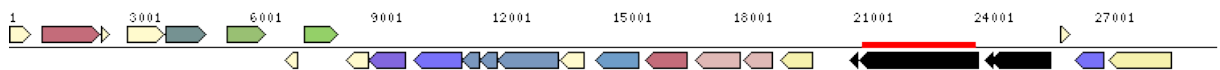

1065

1066 **in black 23S-tRNA Ala-16S**

1067

1068 **Candidatus Methanoperedens nitroreducens ANME-2d (ANME\_V10)**

1069 [https://img.jgi.doe.gov/cgi-](https://img.jgi.doe.gov/cgi-bin/m/main.cgi?section=TaxonDetail&page=taxonDetail&taxon_oid=2515154041)  
 1070 [bin/m/main.cgi?section=TaxonDetail&page=taxonDetail&taxon\\_oid=2515154041](https://img.jgi.doe.gov/cgi-bin/m/main.cgi?section=TaxonDetail&page=taxonDetail&taxon_oid=2515154041)

1071 **16S+23S rRNA**

1072 [https://img.jgi.doe.gov/cgi-](https://img.jgi.doe.gov/cgi-bin/m/main.cgi?section=ScaffoldGraph&page=scaffoldGraph&scaffold_oid=2515157734&start_coord=261866&end_coord=544976&marker_gene=2515322110&seq_length=544976)  
 1073 [bin/m/main.cgi?section=ScaffoldGraph&page=scaffoldGraph&scaffold\\_oid=2515157734&start\\_coord=261866&end\\_coord=544976&marker\\_gene=2515322110&seq\\_length=544976](https://img.jgi.doe.gov/cgi-bin/m/main.cgi?section=ScaffoldGraph&page=scaffoldGraph&scaffold_oid=2515157734&start_coord=261866&end_coord=544976&marker_gene=2515322110&seq_length=544976)  
 1074

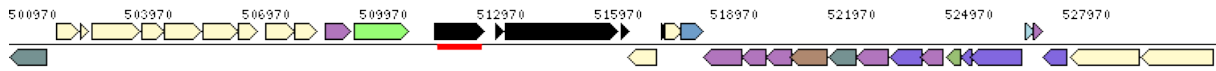

1075  
 1076 **in black 16S-tRNA Ala-23S-5S rRNA**

1077  
 1078  
 1079 ***Thermoproteus tenax* Kra 1, complete genome**

1080 GenBank: FN869859.1

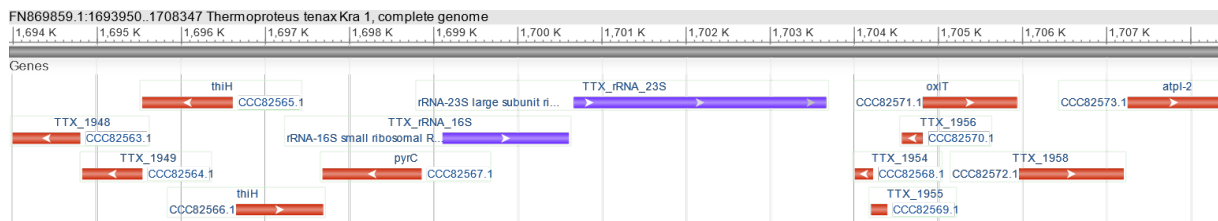

1081  
 1082  
 1083
